# Supplementary material for: Mind-Personality Relations from Childhood to Early Adulthood
Source: Preprints.org preprint supplement (doi:10.20944/preprints201808.0180.v1), 2018-08-09
Supplement: Supplementary file 1 [file supplementary]

Supplementary Table 1. Correlations, means, SD of the variables used in Study 1 (total sample).

| Variables | 1     | 2     | 3     | 4     | 5     | 6     | 7     | 8     | 9     | 10    | 11    | 12    | 13    | 14    | 15    | 16    | 17    | 18    |
|-----------|-------|-------|-------|-------|-------|-------|-------|-------|-------|-------|-------|-------|-------|-------|-------|-------|-------|-------|
| 1. age    | 1.00  |       |       |       |       |       |       |       |       |       |       |       |       |       |       |       |       |       |
| 2. mat1   | 0.63  | 1.00  |       |       |       |       |       |       |       |       |       |       |       |       |       |       |       |       |
| 3. mat2   | 0.49  | 0.49  | 1.00  |       |       |       |       |       |       |       |       |       |       |       |       |       |       |       |
| 4. mat3   | 0.36  | 0.48  | 0.49  | 1.00  |       |       |       |       |       |       |       |       |       |       |       |       |       |       |
| 5. ded1   | 0.57  | 0.48  | 0.35  | 0.29  | 1.00  |       |       |       |       |       |       |       |       |       |       |       |       |       |
| 6. ded2   | 0.57  | 0.44  | 0.45  | 0.47  | 0.47  | 1.00  |       |       |       |       |       |       |       |       |       |       |       |       |
| 7. ded3   | 0.52  | 0.43  | 0.37  | 0.34  | 0.45  | 0.58  | 1.00  |       |       |       |       |       |       |       |       |       |       |       |
| 8. sci1   | 0.64  | 0.55  | 0.33  | 0.32  | 0.41  | 0.43  | 0.42  | 1.00  |       |       |       |       |       |       |       |       |       |       |
| 9. sci2   | 0.58  | 0.56  | 0.39  | 0.37  | 0.45  | 0.46  | 0.42  | 0.67  | 1.00  |       |       |       |       |       |       |       |       |       |
| 10. sci3  | 0.58  | 0.50  | 0.51  | 0.41  | 0.45  | 0.50  | 0.40  | 0.56  | 0.64  | 1.00  |       |       |       |       |       |       |       |       |
| 11. P1    | 0.11  | 0.03  | 0.00  | 0.02  | 0.05  | 0.13  | 0.06  | 0.16  | 0.13  | 0.12  | 1.00  |       |       |       |       |       |       |       |
| 12. N1    | 0.26  | 0.16  | 0.19  | 0.11  | 0.18  | 0.20  | 0.11  | 0.15  | 0.18  | 0.18  | 0.22  | 1.00  |       |       |       |       |       |       |
| 13. E1    | 0.01  | 0.00  | 0.05  | 0.04  | 0.04  | 0.01  | 0.12  | -0.05 | -0.12 | 0.01  | 0.13  | -0.13 | 1.00  |       |       |       |       |       |
| 14. L1    | -0.51 | -0.41 | -0.31 | -0.22 | -0.39 | -0.36 | -0.30 | -0.45 | -0.37 | -0.38 | -0.49 | -0.53 | 0.00  | 1.00  |       |       |       |       |
| 15. P2    | 0.15  | 0.11  | 0.08  | 0.03  | 0.14  | 0.15  | 0.13  | 0.26  | 0.21  | 0.23  | 0.72  | 0.18  | 0.11  | -0.49 | 1.00  |       |       |       |
| 16. N2    | 0.18  | 0.07  | 0.23  | 0.09  | 0.13  | 0.19  | 0.14  | 0.14  | 0.11  | 0.11  | 0.10  | 0.76  | -0.16 | -0.34 | 0.11  | 1.00  |       |       |
| 17. E2    | 0.01  | 0.09  | 0.08  | 0.14  | -0.04 | 0.04  | 0.10  | 0.01  | -0.05 | 0.03  | 0.22  | -0.10 | 0.79  | -0.07 | 0.16  | -0.15 | 1.00  |       |
| 18. P2    | -0.50 | -0.42 | -0.39 | -0.24 | -0.40 | -0.39 | -0.37 | -0.43 | -0.40 | -0.40 | -0.40 | -0.49 | -0.06 | 0.85  | -0.49 | -0.39 | -0.09 | 1.00  |
| Mean      | 12.6  | 3.04  | 3.47  | 3.64  | 2.21  | 2.61  | 2.98  | 1.82  | 2.65  | 2.81  | 2.25  | 9.40  | 17.38 | 12.50 | 2.52  | 8.46  | 17.99 | 11.27 |
| S.D.      | 1.70  | 1.21  | 0.84  | 0.71  | 0.87  | 0.80  | 0.63  | 1.17  | 1.25  | 1.17  | 2.11  | 4.48  | 3.34  | 5.71  | 2.24  | 5.02  | 3.19  | 6.06  |

Note. The symbols mat, ded, and sci stand for Raven-like matrices, deductive, and scientific reasoning; the symbols P, N, E and L stand for Eysenck's factors of psychoticism, neuroticism, extroversion, and likeability-lying, respectively. Numbers indicate testing wave.

Supplementary Table 2. Correlations, means, SD of the variables used in Study 2 (total sample).

| Variables    | 1     | 2     | 3     | 4     | 5     | 6     | 7     | 8     | 9     | 10    | 11    | 12    | 13    | 14    | 15    | 16    | 17    | 18    | 19    | 20    |
|--------------|-------|-------|-------|-------|-------|-------|-------|-------|-------|-------|-------|-------|-------|-------|-------|-------|-------|-------|-------|-------|
| 1. FDS_1     | 1.00  |       |       |       |       |       |       |       |       |       |       |       |       |       |       |       |       |       |       |       |
| 2. BDS_1     | 0.69  | 1.00  |       |       |       |       |       |       |       |       |       |       |       |       |       |       |       |       |       |       |
| 3. FDS_2     | 0.70  | 0.62  | 1.00  |       |       |       |       |       |       |       |       |       |       |       |       |       |       |       |       |       |
| 4. BDS_2     | 0.59  | 0.64  | 0.69  | 1.00  |       |       |       |       |       |       |       |       |       |       |       |       |       |       |       |       |
| 5. RAV_A_1   | 0.35  | 0.41  | 0.38  | 0.42  | 1.00  |       |       |       |       |       |       |       |       |       |       |       |       |       |       |       |
| 6. RAV_B_1   | 0.39  | 0.41  | 0.37  | 0.41  | 0.63  | 1.00  |       |       |       |       |       |       |       |       |       |       |       |       |       |       |
| 7. RAV_C_1   | 0.46  | 0.52  | 0.45  | 0.51  | 0.66  | 0.74  | 1.00  |       |       |       |       |       |       |       |       |       |       |       |       |       |
| 8. RAV_D_1   | 0.44  | 0.48  | 0.44  | 0.51  | 0.62  | 0.75  | 0.75  | 1.00  |       |       |       |       |       |       |       |       |       |       |       |       |
| 9. RAV_E_1   | 0.53  | 0.61  | 0.53  | 0.61  | 0.52  | 0.58  | 0.73  | 0.66  | 1.00  |       |       |       |       |       |       |       |       |       |       |       |
| 10. RAV_A_2  | 0.28  | 0.31  | 0.29  | 0.34  | 0.50  | 0.48  | 0.48  | 0.48  | 0.39  | 1.00  |       |       |       |       |       |       |       |       |       |       |
| 11. RAV_B_2  | 0.35  | 0.36  | 0.34  | 0.41  | 0.57  | 0.63  | 0.61  | 0.68  | 0.51  | 0.49  | 1.00  |       |       |       |       |       |       |       |       |       |
| 12. RAV_C_2  | 0.45  | 0.51  | 0.47  | 0.51  | 0.59  | 0.64  | 0.73  | 0.68  | 0.68  | 0.51  | 0.69  | 1.00  |       |       |       |       |       |       |       |       |
| 13. RAV_D_2  | 0.46  | 0.52  | 0.51  | 0.54  | 0.60  | 0.65  | 0.67  | 0.70  | 0.66  | 0.47  | 0.68  | 0.77  | 1.00  |       |       |       |       |       |       |       |
| 14. RAV_E_2  | 0.51  | 0.56  | 0.54  | 0.60  | 0.51  | 0.54  | 0.67  | 0.61  | 0.82  | 0.43  | 0.54  | 0.73  | 0.69  | 1.00  |       |       |       |       |       |       |
| 15. PROP_1   | 0.52  | 0.57  | 0.51  | 0.54  | 0.40  | 0.41  | 0.57  | 0.49  | 0.72  | 0.34  | 0.36  | 0.55  | 0.52  | 0.70  | 1.00  |       |       |       |       |       |
| 16. PROP_2   | 0.53  | 0.58  | 0.52  | 0.57  | 0.44  | 0.43  | 0.58  | 0.52  | 0.72  | 0.33  | 0.39  | 0.56  | 0.56  | 0.69  | 0.83  | 1.00  |       |       |       |       |
| 17. ARITH_1  | 0.51  | 0.53  | 0.52  | 0.59  | 0.53  | 0.54  | 0.59  | 0.59  | 0.67  | 0.36  | 0.55  | 0.60  | 0.62  | 0.67  | 0.55  | 0.59  | 1.00  |       |       |       |
| 18. ARITH_2  | 0.52  | 0.51  | 0.51  | 0.53  | 0.50  | 0.55  | 0.55  | 0.58  | 0.58  | 0.43  | 0.52  | 0.61  | 0.59  | 0.61  | 0.48  | 0.57  | 0.70  | 1.00  |       |       |
| 19. ALG_1    | 0.58  | 0.63  | 0.58  | 0.65  | 0.52  | 0.53  | 0.65  | 0.60  | 0.79  | 0.38  | 0.51  | 0.69  | 0.66  | 0.77  | 0.76  | 0.80  | 0.75  | 0.65  | 1.00  |       |
| 20. ALG_2    | 0.56  | 0.61  | 0.58  | 0.62  | 0.52  | 0.56  | 0.63  | 0.62  | 0.74  | 0.38  | 0.50  | 0.66  | 0.67  | 0.76  | 0.71  | 0.76  | 0.69  | 0.67  | 0.87  | 1.00  |
| 21.          | 0.50  | 0.50  | 0.50  | 0.50  | 0.45  | 0.43  | 0.50  | 0.48  | 0.59  | 0.29  | 0.39  | 0.51  | 0.55  | 0.60  | 0.53  | 0.59  | 0.55  | 0.61  | 0.66  | 0.68  |
| 22.          | 0.49  | 0.47  | 0.46  | 0.47  | 0.47  | 0.40  | 0.47  | 0.42  | 0.52  | 0.31  | 0.38  | 0.45  | 0.48  | 0.56  | 0.50  | 0.56  | 0.54  | 0.53  | 0.62  | 0.63  |
| 23. CH_CL_1  | 0.41  | 0.42  | 0.42  | 0.43  | 0.37  | 0.32  | 0.41  | 0.39  | 0.46  | 0.28  | 0.32  | 0.41  | 0.44  | 0.48  | 0.42  | 0.47  | 0.49  | 0.48  | 0.56  | 0.57  |
| 24. CH_CL_2  | 0.44  | 0.42  | 0.43  | 0.44  | 0.40  | 0.37  | 0.45  | 0.49  | 0.48  | 0.31  | 0.40  | 0.45  | 0.51  | 0.50  | 0.42  | 0.48  | 0.52  | 0.50  | 0.56  | 0.59  |
| 25. DAT_LH1  | 0.43  | 0.36  | 0.40  | 0.40  | 0.34  | 0.37  | 0.44  | 0.39  | 0.41  | 0.29  | 0.38  | 0.45  | 0.43  | 0.44  | 0.38  | 0.43  | 0.49  | 0.49  | 0.52  | 0.51  |
| 26. DAT_RH1  | 0.52  | 0.48  | 0.53  | 0.51  | 0.48  | 0.51  | 0.54  | 0.53  | 0.57  | 0.33  | 0.45  | 0.54  | 0.58  | 0.60  | 0.51  | 0.57  | 0.64  | 0.61  | 0.65  | 0.65  |
| 27. DAT_LH2  | 0.40  | 0.38  | 0.41  | 0.39  | 0.41  | 0.36  | 0.39  | 0.40  | 0.39  | 0.31  | 0.32  | 0.42  | 0.42  | 0.44  | 0.36  | 0.44  | 0.45  | 0.47  | 0.49  | 0.55  |
| 28. DAT_RH2  | 0.57  | 0.51  | 0.54  | 0.54  | 0.50  | 0.49  | 0.55  | 0.54  | 0.57  | 0.34  | 0.44  | 0.56  | 0.60  | 0.62  | 0.51  | 0.58  | 0.64  | 0.64  | 0.65  | 0.70  |
| 29. S_ATT1   | 0.28  | 0.22  | 0.25  | 0.21  | 0.26  | 0.24  | 0.26  | 0.29  | 0.28  | 0.14  | 0.27  | 0.30  | 0.30  | 0.29  | 0.23  | 0.30  | 0.31  | 0.28  | 0.32  | 0.32  |
| 30. S_ATT2   | 0.28  | 0.25  | 0.21  | 0.22  | 0.35  | 0.27  | 0.27  | 0.23  | 0.26  | 0.21  | 0.25  | 0.26  | 0.30  | 0.34  | 0.22  | 0.26  | 0.31  | 0.29  | 0.29  | 0.29  |
| 31. EXTR_CH  | 0.19  | 0.22  | 0.20  | 0.14  | 0.21  | 0.13  | 0.19  | 0.18  | 0.20  | 0.20  | 0.15  | 0.20  | 0.20  | 0.18  | 0.16  | 0.18  | 0.24  | 0.18  | 0.23  | 0.24  |
| 32.          | 0.06  | 0.09  | 0.07  | 0.07  | 0.14  | 0.11  | 0.11  | 0.16  | 0.08  | 0.07  | 0.08  | 0.09  | 0.13  | 0.01  | -0.01 | 0.04  | 0.09  | 0.09  | 0.09  | 0.09  |
| 33. CONS_CH  | -0.16 | -0.16 | -0.16 | -0.15 | -0.11 | -0.10 | -0.17 | -0.12 | -0.21 | -0.07 | -0.11 | -0.15 | -0.15 | -0.25 | -0.22 | -0.15 | -0.18 | -0.10 | -0.26 | -0.24 |
| 34. EMO_CH   | 0.14  | 0.14  | 0.13  | 0.12  | 0.11  | 0.13  | 0.16  | 0.16  | 0.13  | 0.18  | 0.15  | 0.16  | 0.17  | 0.14  | 0.10  | 0.14  | 0.17  | 0.16  | 0.14  | 0.14  |
| 35. INTEL_CH | 0.05  | 0.01  | 0.04  | 0.05  | 0.10  | 0.10  | 0.12  | 0.10  | 0.09  | 0.09  | 0.08  | 0.08  | 0.08  | 0.04  | 0.08  | 0.09  | 0.10  | 0.08  | 0.10  | 0.10  |
| Mean         | 6.22  | 4.55  | 6.73  | 5.00  | 10.83 | 9.67  | 8.10  | 8.30  | 4.78  | 11.16 | 10.29 | 8.78  | 8.69  | 5.69  | 22.50 | 25.65 | 5.55  | 6.19  | 6.43  | 7.39  |
| S.D.         | 1.35  | 1.43  | 1.23  | 1.50  | 1.46  | 2.66  | 2.87  | 2.99  | 3.50  | 1.14  | 2.24  | 2.59  | 2.74  | 3.44  | 16.40 | 18.94 | 1.72  | 1.67  | 3.54  | 3.49  |

| Variables    | 21    | 22    | 23    | 24    | 25    | 26    | 27    | 28    | 29    | 30    | 31    | 32    | 33    | 34    | 35    |
|--------------|-------|-------|-------|-------|-------|-------|-------|-------|-------|-------|-------|-------|-------|-------|-------|
| 21. WORDRC1  | 1.00  |       |       |       |       |       |       |       |       |       |       |       |       |       |       |
| 22. WORDRC2  | 0.78  | 1.00  |       |       |       |       |       |       |       |       |       |       |       |       |       |
| 23. CH_CL_1  | 0.64  | 0.58  | 1.00  |       |       |       |       |       |       |       |       |       |       |       |       |
| 24. CH_CL_2  | 0.62  | 0.59  | 0.70  | 1.00  |       |       |       |       |       |       |       |       |       |       |       |
| 25. DAT_LH1  | 0.59  | 0.60  | 0.58  | 0.60  | 1.00  |       |       |       |       |       |       |       |       |       |       |
| 26. DAT_RH1  | 0.72  | 0.68  | 0.67  | 0.71  | 0.75  | 1.00  |       |       |       |       |       |       |       |       |       |
| 27. DAT_LH2  | 0.58  | 0.62  | 0.51  | 0.58  | 0.70  | 0.68  | 1.00  |       |       |       |       |       |       |       |       |
| 28. DAT_RH2  | 0.70  | 0.68  | 0.62  | 0.73  | 0.70  | 0.85  | 0.75  | 1.00  |       |       |       |       |       |       |       |
| 29. S_ATT1   | 0.29  | 0.33  | 0.32  | 0.46  | 0.36  | 0.51  | 0.34  | 0.41  | 1.00  |       |       |       |       |       |       |
| 30. S_ATT2   | 0.32  | 0.40  | 0.39  | 0.28  | 0.35  | 0.41  | 0.34  | 0.43  | 0.38  | 1.00  |       |       |       |       |       |
| 31. EXTR_CH  | 0.24  | 0.24  | 0.22  | 0.23  | 0.25  | 0.31  | 0.24  | 0.28  | 0.16  | 0.13  | 1.00  |       |       |       |       |
| 32. AGREE_CH | 0.16  | 0.13  | 0.10  | 0.18  | 0.14  | 0.16  | 0.19  | 0.12  | 0.07  | 0.05  | 0.32  | 1.00  |       |       |       |
| 33. CONS_CH  | -0.19 | -0.18 | -0.16 | -0.16 | -0.17 | -0.22 | -0.12 | -0.19 | -0.13 | -0.05 | -0.11 | 0.21  | 1.00  |       |       |
| 34. EMO_CH   | 0.07  | 0.05  | 0.09  | 0.08  | 0.03  | 0.12  | 0.03  | 0.11  | 0.03  | 0.00  | 0.26  | 0.06  | 0.17  | 1.00  |       |
| 35. INTEL_CH | 0.07  | 0.11  | 0.06  | 0.05  | 0.07  | 0.05  | 0.09  | 0.07  | 0.00  | 0.07  | 0.31  | 0.30  | 0.25  | 0.14  | 1.00  |
| Mean         | -0.55 | -0.53 | -0.65 | -0.64 | -0.73 | -1.15 | -0.72 | -1.01 | -0.19 | -0.16 | 34.01 | 37.92 | 35.71 | 32.23 | 35.46 |
| S.D.         | 0.12  | 0.11  | 0.22  | 0.21  | 0.38  | 0.68  | 0.30  | 0.48  | 0.24  | 0.20  | 5.69  | 6.12  | 7.16  | 6.90  | 5.55  |

Symbols FDS and BDS stand for forward and backward digit span, respectively; symbols RAV\_A-E stand for the five sets of SPM of the Raven test; symbols PROP, ARITH, and ALG stand for proportional, arithmetic, and algebraic reasoning, respectively; the symbols WORDRC and CH-CL stand for reaction times in word recognition and choice reaction tasks, respectively; the symbols DAT\_LH, DAT\_RH, and S\_ATT stand for reaction times to divided attention and Stroop incompatible tasks; symbols EXTR\_CH, AGREE\_CH, CONS\_CH, EMO\_CH, and INTEL\_CH stand for children's self-rating scores on extroversion, agreeableness, conscientiousness, neuroticism, and openness, respectively. Z scores were used for reaction times to facilitate model estimation. Numbers indicate testing waves.

Supplementary Table 3. Correlations, means, SD of the variables used in Study 3 (total sample).

| Variables    | 1     | 2     | 3     | 4     | 5     | 6     | 7     | 8     | 9     | 10    | 11    | 12    | 13    | 14    | 15    | 16    | 17    | 18    | 19    | 20    |
|--------------|-------|-------|-------|-------|-------|-------|-------|-------|-------|-------|-------|-------|-------|-------|-------|-------|-------|-------|-------|-------|
| 1. AGE       | 1.00  |       |       |       |       |       |       |       |       |       |       |       |       |       |       |       |       |       |       |       |
| 2. SR1SELFR  | -0.10 | 1.00  |       |       |       |       |       |       |       |       |       |       |       |       |       |       |       |       |       |       |
| 3. SR2SELFR  | -0.14 | 0.43  | 1.00  |       |       |       |       |       |       |       |       |       |       |       |       |       |       |       |       |       |
| 4. SR50SELF  | -0.13 | 0.21  | 0.38  | 1.00  |       |       |       |       |       |       |       |       |       |       |       |       |       |       |       |       |
| 5. EI8       | -0.21 | 0.03  | 0.06  | 0.09  | 1.00  |       |       |       |       |       |       |       |       |       |       |       |       |       |       |       |
| 6. EI13      | -0.13 | -0.13 | 0.09  | 0.09  | -0.01 | 1.00  |       |       |       |       |       |       |       |       |       |       |       |       |       |       |
| 7. EI15      | -0.14 | 0.05  | 0.00  | 0.00  | 0.48  | -0.05 | 1.00  |       |       |       |       |       |       |       |       |       |       |       |       |       |
| 8. EI17      | -0.21 | -0.03 | -0.09 | 0.16  | 0.02  | 0.18  | -0.16 | 1.00  |       |       |       |       |       |       |       |       |       |       |       |       |
| 9. EI18      | 0.03  | 0.02  | 0.18  | 0.22  | -0.06 | 0.22  | -0.05 | 0.32  | 1.00  |       |       |       |       |       |       |       |       |       |       |       |
| 10. EI19     | 0.03  | -0.10 | 0.07  | 0.07  | -0.09 | 0.29  | -0.10 | 0.32  | 0.39  | 1.00  |       |       |       |       |       |       |       |       |       |       |
| 11. EI20     | -0.14 | 0.04  | -0.04 | 0.19  | -0.08 | 0.06  | -0.20 | 0.43  | 0.39  | 0.32  | 1.00  |       |       |       |       |       |       |       |       |       |
| 12. EI21     | -0.10 | -0.07 | 0.08  | 0.22  | -0.10 | 0.21  | -0.17 | 0.34  | 0.37  | 0.32  | 0.31  | 1.00  |       |       |       |       |       |       |       |       |
| 13. EI25     | 0.00  | -0.07 | 0.02  | 0.13  | 0.08  | 0.55  | -0.01 | 0.23  | 0.25  | 0.37  | 0.11  | 0.18  | 1.00  |       |       |       |       |       |       |       |
| 14. EI26     | 0.20  | -0.16 | 0.05  | 0.04  | 0.03  | 0.28  | 0.02  | 0.15  | 0.31  | 0.46  | 0.22  | 0.16  | 0.39  | 1.00  |       |       |       |       |       |       |
| 15. EI31     | -0.19 | 0.06  | 0.03  | -0.03 | 0.33  | -0.03 | 0.36  | -0.21 | -0.15 | -0.13 | -0.25 | -0.12 | -0.10 | -0.05 | 1.00  |       |       |       |       |       |
| 16. EI35     | -0.17 | 0.11  | 0.07  | 0.05  | 0.35  | 0.06  | 0.38  | -0.10 | 0.10  | 0.05  | -0.04 | -0.03 | 0.10  | 0.00  | 0.38  | 1.00  |       |       |       |       |
| 17. SEA F1   | 0.18  | -0.09 | 0.07  | 0.06  | -0.17 | 0.09  | -0.10 | 0.01  | 0.21  | -0.06 | 0.06  | 0.01  | 0.01  | 0.11  | -0.18 | -0.21 | 1.00  |       |       |       |
| 18. SEA SD1  | 0.03  | -0.08 | -0.10 | 0.03  | 0.01  | 0.01  | -0.19 | 0.15  | 0.11  | -0.01 | 0.16  | 0.06  | 0.10  | -0.01 | 0.07  | -0.03 | 0.14  | 1.00  |       |       |
| 19. SEA MT5  | 0.15  | 0.11  | 0.02  | -0.05 | -0.04 | 0.03  | -0.10 | -0.03 | -0.01 | -0.07 | 0.01  | -0.12 | 0.04  | 0.03  | -0.06 | -0.05 | 0.02  | -0.01 | 1.00  |       |
| 20. SEA S1   | 0.20  | -0.07 | -0.05 | -0.04 | -0.10 | 0.02  | -0.05 | -0.09 | 0.07  | -0.04 | 0.03  | -0.14 | 0.03  | 0.02  | -0.02 | 0.00  | 0.16  | 0.07  | 0.11  | 1.00  |
| 21. SRMATH1  | -0.14 | 0.18  | 0.21  | 0.24  | 0.06  | 0.15  | 0.04  | 0.16  | -0.04 | 0.07  | 0.21  | 0.07  | 0.13  | 0.10  | 0.03  | 0.10  | -0.02 | 0.09  | 0.06  | -0.02 |
| 22. SRSUP1   | 0.08  | 0.13  | 0.05  | 0.24  | -0.13 | 0.29  | -0.16 | 0.24  | 0.25  | 0.17  | 0.29  | 0.19  | 0.31  | 0.20  | -0.15 | -0.11 | 0.24  | 0.22  | 0.11  | 0.12  |
| 23. SRSUP2   | 0.05  | 0.09  | 0.15  | 0.37  | 0.04  | 0.25  | 0.03  | 0.09  | 0.20  | 0.34  | 0.18  | 0.07  | 0.32  | 0.26  | 0.04  | 0.14  | 0.05  | 0.12  | 0.11  | -0.10 |
| 24. SRSOC2   | 0.17  | 0.14  | 0.10  | 0.18  | -0.13 | 0.18  | -0.05 | 0.06  | 0.22  | 0.22  | 0.27  | 0.15  | 0.22  | 0.22  | -0.16 | -0.08 | 0.15  | 0.09  | 0.02  | 0.10  |
| 25. SRSPOR   | 0.05  | 0.22  | 0.23  | 0.21  | 0.02  | 0.14  | 0.06  | 0.05  | 0.14  | 0.22  | -0.03 | 0.10  | 0.13  | 0.15  | 0.16  | 0.19  | -0.06 | -0.02 | 0.08  | -0.03 |
| 26. F2ACHIE  | -0.23 | 0.13  | 0.12  | 0.22  | -0.11 | 0.13  | -0.23 | 0.27  | 0.10  | 0.15  | 0.26  | 0.20  | 0.02  | 0.06  | -0.02 | -0.08 | 0.07  | 0.07  | -0.05 | -0.06 |
| 27. F2ORG    | -0.25 | 0.10  | 0.16  | 0.20  | 0.02  | 0.18  | -0.16 | 0.21  | 0.14  | 0.21  | 0.19  | 0.21  | 0.22  | 0.11  | -0.01 | 0.00  | 0.03  | 0.13  | -0.02 | -0.10 |
| 28. F1EMO    | 0.08  | -0.14 | -0.14 | -0.10 | -0.02 | -0.11 | 0.08  | -0.08 | 0.05  | 0.04  | -0.02 | -0.07 | -0.06 | 0.04  | 0.14  | 0.05  | -0.01 | -0.03 | -0.10 | -0.07 |
| 29. F1EGO    | 0.15  | -0.07 | -0.05 | 0.04  | 0.08  | -0.10 | 0.06  | -0.02 | 0.11  | 0.12  | 0.08  | 0.10  | -0.03 | 0.09  | 0.09  | 0.09  | -0.06 | 0.02  | -0.05 | -0.04 |
| 30. F5PROS   | -0.04 | -0.02 | -0.15 | -0.02 | -0.11 | 0.02  | -0.08 | 0.14  | 0.13  | 0.33  | 0.16  | 0.05  | 0.07  | 0.17  | -0.06 | -0.03 | -0.11 | 0.06  | -0.12 | -0.06 |
| 31. F5EXT    | -0.09 | 0.13  | -0.01 | 0.11  | -0.07 | 0.07  | -0.03 | 0.01  | 0.03  | 0.08  | 0.13  | 0.18  | 0.09  | 0.16  | -0.03 | 0.09  | -0.13 | 0.10  | -0.12 | 0.02  |
| 32. F4HELP   | 0.05  | 0.07  | -0.02 | 0.11  | -0.04 | 0.08  | -0.07 | 0.07  | 0.10  | 0.32  | 0.07  | 0.01  | 0.27  | 0.19  | -0.06 | 0.01  | -0.03 | 0.04  | 0.08  | -0.10 |
| 33. F4AGR    | -0.15 | 0.16  | 0.12  | 0.24  | -0.02 | 0.24  | 0.03  | 0.27  | 0.22  | 0.29  | 0.21  | 0.21  | 0.29  | 0.16  | -0.07 | 0.09  | -0.04 | 0.06  | 0.04  | -0.11 |
| 34. F3INTE   | -0.29 | 0.13  | 0.08  | 0.14  | -0.01 | 0.17  | -0.10 | 0.34  | 0.09  | 0.22  | 0.23  | 0.27  | 0.20  | 0.13  | 0.03  | 0.05  | -0.08 | 0.26  | -0.08 | -0.15 |
| 35. F3OPEN   | -0.09 | 0.01  | -0.07 | 0.10  | -0.03 | 0.13  | 0.03  | 0.16  | 0.16  | 0.13  | 0.08  | 0.11  | 0.20  | 0.12  | 0.10  | 0.13  | 0.01  | 0.23  | -0.09 | -0.07 |
| 36. SPATIAL  | 0.53  | -0.06 | -0.07 | -0.14 | -0.05 | -0.01 | -0.08 | -0.01 | 0.09  | 0.04  | 0.03  | -0.15 | 0.08  | 0.28  | -0.16 | -0.11 | 0.20  | 0.17  | 0.05  | 0.15  |
| 37. OUANT    | 0.46  | -0.08 | -0.06 | -0.03 | -0.20 | 0.02  | -0.20 | 0.00  | 0.04  | -0.02 | 0.00  | -0.01 | 0.06  | 0.16  | -0.08 | -0.15 | 0.11  | 0.31  | 0.09  | 0.22  |
| 38. CAUSAL   | 0.40  | -0.09 | -0.12 | -0.14 | -0.17 | 0.04  | -0.24 | 0.08  | 0.08  | 0.13  | 0.09  | 0.01  | 0.11  | 0.10  | -0.15 | -0.13 | 0.12  | 0.27  | 0.03  | 0.17  |
| 39. INDUCT   | 0.38  | 0.05  | -0.07 | -0.03 | -0.10 | -0.02 | -0.05 | 0.01  | 0.03  | -0.04 | 0.05  | -0.02 | 0.02  | 0.07  | -0.16 | -0.12 | 0.17  | 0.04  | 0.34  | 0.12  |
| 40. SOCIAL   | 0.29  | -0.04 | -0.04 | 0.02  | -0.09 | 0.06  | -0.16 | 0.17  | 0.16  | 0.16  | 0.14  | 0.06  | 0.18  | 0.15  | -0.18 | -0.10 | 0.11  | 0.10  | -0.02 | 0.16  |
| 41. TCWL     | 0.03  | 0.13  | -0.03 | 0.04  | -0.01 | -0.02 | -0.10 | 0.14  | -0.04 | 0.05  | 0.08  | -0.05 | -0.08 | -0.10 | 0.05  | -0.15 | -0.04 | -0.06 | -0.01 | 0.03  |
| 42. PEGD     | 0.35  | -0.06 | -0.14 | 0.08  | -0.06 | 0.06  | -0.09 | 0.02  | 0.07  | 0.21  | 0.07  | 0.04  | 0.09  | 0.24  | -0.01 | -0.13 | 0.05  | 0.22  | 0.04  | 0.21  |
| 43. COMEM    | 0.45  | 0.05  | -0.04 | 0.00  | -0.29 | -0.01 | -0.35 | 0.14  | 0.11  | 0.16  | 0.06  | 0.02  | 0.06  | 0.15  | -0.23 | -0.31 | 0.16  | 0.15  | 0.12  | 0.21  |
| 44. STORY    | 0.23  | 0.10  | 0.01  | 0.07  | -0.21 | -0.06 | -0.20 | 0.10  | 0.09  | 0.11  | 0.20  | -0.01 | -0.04 | 0.03  | -0.28 | -0.20 | -0.03 | 0.01  | 0.04  | 0.04  |
| 45. FAC JOY  | -0.02 | 0.11  | 0.34  | 0.18  | 0.03  | 0.31  | 0.00  | 0.21  | 0.23  | 0.20  | -0.01 | 0.20  | 0.29  | 0.11  | 0.00  | -0.05 | 0.13  | -0.02 | 0.02  | -0.07 |
| 46. FAC GRIF | 0.14  | 0.02  | -0.04 | -0.05 | 0.07  | 0.05  | 0.07  | 0.15  | 0.08  | 0.20  | 0.07  | 0.02  | 0.25  | 0.07  | 0.05  | -0.02 | -0.01 | -0.04 | 0.02  | 0.06  |
| 47. FAC SURP | 0.16  | 0.09  | 0.07  | 0.14  | -0.18 | 0.26  | -0.24 | 0.25  | 0.29  | 0.36  | 0.35  | 0.18  | 0.37  | 0.21  | -0.28 | -0.11 | 0.11  | 0.12  | 0.01  | 0.10  |
| 48. GREEK    | -0.12 | 0.03  | 0.00  | 0.13  | -0.13 | 0.06  | -0.24 | 0.25  | 0.11  | 0.09  | 0.27  | 0.13  | 0.04  | 0.05  | -0.17 | -0.09 | 0.09  | 0.17  | 0.00  | 0.13  |
| 49. MATHS    | -0.07 | -0.01 | -0.01 | 0.14  | -0.15 | -0.03 | -0.23 | 0.27  | 0.12  | 0.03  | 0.20  | 0.13  | -0.02 | 0.00  | -0.16 | -0.11 | 0.10  | 0.13  | -0.04 | 0.09  |
| Mean         | 12.77 | 3.98  | 3.63  | 3.49  | 1.92  | 3.29  | 1.55  | 3.37  | 3.20  | 3.53  | 3.79  | 3.59  | 3.19  | 3.40  | 1.54  | 1.78  | 1.69  | 1.34  | 0.88  | 1.18  |
| S.D.         | 2.18  | 0.92  | 1.06  | 0.96  | 1.29  | 1.18  | 0.99  | 1.36  | 1.15  | 1.13  | 1.12  | 1.12  | 1.15  | 1.17  | 0.93  | 1.08  | 0.62  | 0.80  | 0.84  | 0.87  |

Supplementary Table 3.

| Variables    | 21    | 22    | 23    | 24    | 25    | 26    | 27    | 28    | 29    | 30    | 31    | 32    | 33    | 34    | 35    | 36    | 37   | 38    | 39    | 40   |
|--------------|-------|-------|-------|-------|-------|-------|-------|-------|-------|-------|-------|-------|-------|-------|-------|-------|------|-------|-------|------|
| 21. MATH1    | 1.00  |       |       |       |       |       |       |       |       |       |       |       |       |       |       |       |      |       |       |      |
| 22. SUP1     | 0.37  | 1.00  |       |       |       |       |       |       |       |       |       |       |       |       |       |       |      |       |       |      |
| 23. SUP2     | 0.32  | 0.47  | 1.00  |       |       |       |       |       |       |       |       |       |       |       |       |       |      |       |       |      |
| 24. SOC2     | 0.29  | 0.55  | 0.49  | 1.00  |       |       |       |       |       |       |       |       |       |       |       |       |      |       |       |      |
| 25. SPOR     | 0.43  | 0.33  | 0.33  | 0.22  | 1.00  |       |       |       |       |       |       |       |       |       |       |       |      |       |       |      |
| 26. F2ACHIE  | 0.26  | 0.20  | 0.16  | 0.22  | 0.19  | 1.00  |       |       |       |       |       |       |       |       |       |       |      |       |       |      |
| 27. F2ORG    | 0.17  | 0.23  | 0.27  | 0.25  | 0.12  | 0.64  | 1.00  |       |       |       |       |       |       |       |       |       |      |       |       |      |
| 28. F1EMO    | -0.03 | -0.06 | 0.04  | -0.10 | -0.06 | -0.18 | -0.12 | 1.00  |       |       |       |       |       |       |       |       |      |       |       |      |
| 29. F1EGO    | 0.04  | -0.04 | 0.07  | -0.12 | 0.03  | -0.16 | -0.10 | 0.55  | 1.00  |       |       |       |       |       |       |       |      |       |       |      |
| 30. F5PROS   | -0.08 | 0.01  | 0.11  | -0.03 | 0.01  | 0.14  | 0.16  | 0.20  | 0.19  | 1.00  |       |       |       |       |       |       |      |       |       |      |
| 31. F5EXT    | 0.01  | 0.08  | 0.18  | 0.21  | 0.16  | 0.23  | 0.22  | 0.01  | -0.04 | 0.50  | 1.00  |       |       |       |       |       |      |       |       |      |
| 32. F4HELP   | -0.07 | 0.13  | 0.28  | 0.18  | 0.01  | 0.26  | 0.40  | -0.03 | -0.07 | 0.29  | 0.25  | 1.00  |       |       |       |       |      |       |       |      |
| 33. F4AGR    | -0.02 | 0.07  | 0.21  | 0.15  | 0.06  | 0.32  | 0.45  | -0.13 | -0.14 | 0.22  | 0.34  | 0.65  | 1.00  |       |       |       |      |       |       |      |
| 34. F3INTE   | 0.34  | 0.33  | 0.24  | 0.21  | 0.22  | 0.39  | 0.50  | -0.07 | 0.03  | 0.16  | 0.22  | 0.19  | 0.26  | 1.00  |       |       |      |       |       |      |
| 35. F3OPEN   | 0.01  | 0.12  | 0.16  | 0.10  | 0.11  | 0.15  | 0.19  | 0.21  | 0.23  | 0.26  | 0.25  | 0.10  | 0.18  | 0.42  | 1.00  |       |      |       |       |      |
| 36. SPATIAL  | 0.02  | 0.14  | 0.08  | 0.16  | 0.00  | -0.08 | -0.12 | 0.05  | 0.11  | -0.03 | -0.09 | -0.12 | -0.11 | -0.05 | 0.06  | 1.00  |      |       |       |      |
| 37. QUANT    | 0.07  | 0.20  | 0.08  | 0.11  | -0.01 | -0.01 | -0.03 | -0.04 | 0.03  | -0.04 | -0.01 | 0.02  | -0.03 | 0.05  | -0.01 | 0.42  | 1.00 |       |       |      |
| 38. CAUSAL   | 0.00  | 0.17  | 0.06  | 0.18  | -0.09 | 0.06  | 0.05  | 0.03  | 0.09  | 0.09  | -0.05 | 0.10  | -0.07 | -0.01 | 0.10  | 0.44  | 0.43 | 1.00  |       |      |
| 39. QUAL     | 0.10  | 0.09  | 0.03  | 0.08  | 0.02  | -0.03 | -0.02 | -0.04 | 0.06  | -0.06 | -0.19 | 0.09  | -0.06 | -0.04 | -0.04 | 0.29  | 0.28 | 0.32  | 1.00  |      |
| 40. SOCIAL   | 0.16  | 0.32  | 0.13  | 0.22  | 0.12  | 0.07  | 0.06  | 0.08  | 0.00  | 0.01  | -0.01 | 0.00  | -0.08 | 0.06  | 0.07  | 0.29  | 0.31 | 0.26  | 0.19  | 1.00 |
| 41. TCWL     | -0.07 | 0.03  | -0.01 | -0.01 | -0.12 | 0.22  | 0.19  | -0.08 | 0.03  | 0.17  | 0.13  | 0.22  | 0.14  | 0.07  | -0.03 | -0.06 | 0.01 | 0.28  | 0.03  | 0.00 |
| 42. PEGD     | 0.05  | 0.16  | 0.13  | 0.23  | 0.00  | 0.13  | 0.13  | 0.02  | 0.12  | 0.21  | 0.23  | 0.29  | 0.18  | 0.11  | 0.20  | 0.24  | 0.29 | 0.32  | 0.16  | 0.12 |
| 43. COMEM    | -0.05 | 0.24  | 0.08  | 0.22  | -0.08 | 0.08  | 0.04  | -0.01 | 0.02  | 0.19  | 0.03  | 0.17  | -0.02 | 0.07  | 0.08  | 0.26  | 0.34 | 0.44  | 0.26  | 0.33 |
| 44. STORY    | 0.03  | 0.17  | 0.03  | 0.16  | 0.08  | 0.09  | 0.08  | -0.16 | 0.01  | 0.13  | 0.09  | 0.15  | 0.14  | 0.06  | -0.02 | 0.23  | 0.18 | 0.21  | 0.12  | 0.24 |
| 45. FAC_JOY  | 0.12  | 0.29  | 0.22  | 0.13  | 0.24  | 0.21  | 0.32  | -0.20 | 0.01  | -0.01 | 0.06  | 0.12  | 0.16  | 0.18  | 0.10  | -0.02 | 0.00 | 0.14  | -0.04 | 0.11 |
| 46. FAC_GRIF | 0.01  | 0.19  | 0.09  | 0.12  | -0.01 | -0.04 | 0.01  | 0.12  | 0.00  | 0.11  | -0.02 | 0.14  | 0.07  | 0.06  | 0.05  | 0.03  | 0.00 | 0.15  | 0.09  | 0.19 |
| 47. FAC_SURP | 0.16  | 0.43  | 0.36  | 0.33  | 0.12  | 0.26  | 0.25  | 0.02  | 0.01  | 0.18  | 0.13  | 0.33  | 0.26  | 0.27  | 0.10  | 0.08  | 0.11 | 0.29  | 0.14  | 0.20 |
| 48. GREEK    | 0.24  | 0.37  | 0.15  | 0.24  | 0.05  | 0.42  | 0.30  | -0.21 | -0.13 | 0.03  | 0.08  | 0.10  | 0.09  | 0.28  | 0.00  | 0.10  | 0.13 | 0.26  | 0.14  | 0.20 |
| 49. MATHS    | 0.29  | 0.27  | 0.10  | 0.18  | 0.02  | 0.39  | 0.26  | -0.13 | -0.04 | 0.05  | 0.02  | 0.07  | 0.00  | 0.26  | -0.03 | 0.13  | 0.22 | 0.34  | 0.18  | 0.22 |
| Mean         | 3.11  | 3.15  | 3.26  | 3.31  | 2.90  | 3.59  | 3.54  | 2.53  | 2.52  | 3.42  | 3.87  | 3.62  | 3.69  | 3.67  | 3.35  | 1.00  | 0.71 | -0.30 | 2.08  | 0.57 |
| S.D.         | 0.85  | 0.75  | 0.74  | 0.71  | 0.92  | 0.98  | 0.84  | 0.93  | 0.97  | 0.84  | 0.75  | 0.90  | 0.76  | 0.75  | 0.94  | 1.55  | 1.69 | 1.57  | 1.56  | 1.84 |

| Variables    | 41   | 42   | 43   | 44    | 45    | 46    | 47    | 48   | 49   |
|--------------|------|------|------|-------|-------|-------|-------|------|------|
| 41. TCWL     | 1.00 |      |      |       |       |       |       |      |      |
| 42. PEGD     | 0.30 | 1.00 |      |       |       |       |       |      |      |
| 43. COMEM    | 0.30 | 0.39 | 1.00 |       |       |       |       |      |      |
| 44. STORY    | 0.13 | 0.25 | 0.26 | 1.00  |       |       |       |      |      |
| 45. FAC_JOY  | 0.19 | 0.07 | 0.06 | 0.05  | 1.00  |       |       |      |      |
| 46. FAC_GRIF | 0.33 | 0.13 | 0.27 | -0.04 | 0.25  | 1.00  |       |      |      |
| 47. FAC_SURP | 0.24 | 0.24 | 0.33 | 0.18  | 0.34  | 0.38  | 1.00  |      |      |
| 48. GREEK    | 0.22 | 0.12 | 0.24 | 0.20  | 0.06  | 0.02  | 0.31  | 1.00 |      |
| 49. MATHS    | 0.23 | 0.16 | 0.29 | 0.25  | 0.09  | 0.03  | 0.23  | 0.82 | 1.00 |
| Mean         | 4.33 | 3.75 | 5.30 | 3.05  | -0.05 | -0.15 | -0.22 | 4.46 | 4.59 |
| S.D.         | 0.75 | 0.89 | 2.21 | 1.64  | 1.02  | 1.00  | 1.06  | 1.47 | 1.49 |

SR1SELFR, SR2SELFR, and SR50SELF stand for self-representation of self-monitoring and self-regulation ability. EI17, EI18, EI20, and EI21 stand for trait emotional intelligence self-ratings in self-awareness about emotions; EI8, EI15, EI31, EI35 stand for self-ratings in emotional stability; EI13, EI19, EI25, EI26 stand for self-ratings in recognition and management of emotional signals; SEA\_F1, SEA\_SD1, SEA\_M5, and SEA\_S1 stand for self-evaluation accuracy in spatial, quantitative, Raven-like matrices, and scientific reasoning, respectively. SRMATH1, SRSUP1, SRSUP2, SRSOC2, and SRSPOR stand for self-representation scores in specific domains (mathematics, causal, social, verbal, respectively); symbols starting with F (F1-F5) stand Big Five Facets in achievement (F2ACHIE) and order (f2ORG) for C, anxiety (F1EMO) and self-consciousness (F1EGO) for N ; extroversion (F5EXT) and introversion (F5PROS )for E; altruism (F4HELP) , and agreeableness F4AGR) for A; intellect (F3INTE) and openness F3OPEN) for O; The symbols SPATIAL, QUANT, CAUSAL, INDUCT, SOCIAL, stand for spatial, quantitative, causal, inductive, and social reasoning, respectively; the symbols PEGD, COMEM, and STORY stand for performance scores on association of different emotions with corresponding real-life situation and FAC\_JOY FAC\_GRIF FAC\_SURP stand for the specification of characteristics of different emotions; GREEK and MATHS stand for mean performance in Greek and mathematics as scored by teachers.
