# Supplementary material for: Mind-Personality Relations from Childhood to Early Adulthood
Source: Preprints.org preprint supplement (doi:10.20944/preprints201808.0180.v1), 2018-08-09
Supplement: Supplementary file 2 [file supplementary]

# **SUPPLEMENTARY FILE PRESENTING MODEL CODES AND FULL STANDARDIZED SOLUTIONS FOR THE MAIN MODELS PRESENTED IN THE PAPER.**

All Confirmatory Factor Analysis and Structural Equation Models were tested by EQS 6.1. Latent transition models were tested by Mplus 7.31. Thus, the model codes below must be read in conjunction with the language specification of each of these two programs.

The correlations and statistics of the variables used in the various models are presented in Supplementary Tables. Below only variables used in the model concerned are mentioned.

## **STUDY 1**

### **Model 1: Model for specifying the correlation between g and the GFP at first testing wave.**

```
/VARIABLES
V4=MATRICES1; V7=DEDUCTIVE1; V13=SCIENTIFIC1;
V19=P1; V20=N1; V21=E1; V22=L1;
```

```
F1=GF1; F4=GFP1; F7=P; F8=N; F9=E; F10=L;
```

```
/EQUATIONS
V4= 1F1+E4;
V7= *F1+E7;
V13= *F1+E13;
```

```
V27= F4+E27;
V28= *F4+E28;
V29= *F4+E29;
V83= *F4+E83;
```

```
/VAR
F1=*;
F4=*
```

All error variances were free to be estimated.

```
/COV
F1, F4=*
```

```
/END
```

#### STANDARDIZED SOLUTION:

#### R-SQUARED

|      |      |   |          |   |           |       |
|------|------|---|----------|---|-----------|-------|
| MAT1 | =V4  | = | .752 F1  | + | .659 E4   | .566  |
| DED1 | =V7  | = | .615*F1  | + | .788 E7   | .378  |
| SCI1 | =V13 | = | .723*F1  | + | .691 E13  | .522  |
| P1   | =V27 | = | .494 F4  | + | .870 E27  | .244  |
| N1   | =V28 | = | .528*F4  | + | .849 E28  | .279  |
| E1   | =V29 | = | -.002*F4 | + | 1.000 E29 | .000  |
| L1I  | =V83 | = | 1.000*F4 | + | .000 E83  | 1.000 |

#### CORRELATIONS AMONG INDEPENDENT VARIABLES

|   |    |   |      |        |
|---|----|---|------|--------|
| I | F4 | - | GFP1 | .590*I |
| I | F1 | - | GF1  | I      |
| I |    |   |      | I      |

GOODNESS OF FIT SUMMARY FOR METHOD = ML

MODEL AIC = 12.540 MODEL CAIC = -46.749  
 CHI-SQUARE = 38.540 BASED ON 13 DEGREES OF FREEDOM  
 PROBABILITY VALUE FOR THE CHI-SQUARE STATISTIC IS .00024  
 COMPARATIVE FIT INDEX (CFI) = .940  
 STANDARDIZED RMR = .062  
 ROOT MEAN-SQUARE ERROR OF APPROXIMATION (RMSEA) = .087  
 90% CONFIDENCE INTERVAL OF RMSEA ( .056, .119)

RELIABILITY COEFFICIENTS

-----  
 CRONBACH'S ALPHA = .668  
 RELIABILITY COEFFICIENT RHO = .777

**Model 2: Growth model for Gf at the three testing waves; personality factors at first wave were used as factors influencing the intercept and slope of Gf growth factors.**

/VARIABLES

V77=MGF\_Z1; V78=MGF\_Z2; V79=MGF\_Z3;  
 V27=Z\_P1; V28=Z\_N1; V29=Z\_E1; V30=Z\_L1;

F1=INTER\_GF;  
 F2=SLOPE\_GF;

F9=E;  
 F10=L  
 F11=P;  
 F12=N;

/EQUATIONS

V77= 1F1+0F2+E77;  
 V78= 1F1+1F2+E78;  
 V79= 1F1+2F2+E79;

V27= F11+E27;  
 V28= F12+E28;  
 V29= F9+E29;  
 V30= F10+E30;

F1=0\*V999+\*d9+\*d11+\*d12+\*f10+D1;  
 F2=0\*V999+\*d9+\*d11+\*d12+\*f10+D2;

F11=\*F10+D11;  
 F12=\*F10+D12;  
 F9= \*F10+D9;

```

/VAR
V999=1;

F10=*;

E77 TO E79=*;
E27 to E28 =.2;
D1 TO D2=*;
D9=*;
D11 to D12=*;

/COV
E29,E27=*;
/END

```

| STANDARDIZED SOLUTION: |      |           |           |          |                    | R-SQUARED         |      |
|------------------------|------|-----------|-----------|----------|--------------------|-------------------|------|
| Z_P1                   | =V27 | =         | .885 F11  | +        | .465 E27           | .784              |      |
| Z_N1                   | =V28 | =         | .894 F12  | +        | .447 E28           | .800              |      |
| Z_E1                   | =V29 | =         | .895 F9   | +        | .445 E29           | .802              |      |
| Z_L1                   | =V30 | =         | .895 F10  | +        | .447 E30           | .801              |      |
| MGF_Z1                 | =V77 | =         | .887 F1   | +        | .461 E77           | .787              |      |
| MGF_Z2                 | =V78 | =         | .899 F1   | +        | .293 F2 + .509 E78 | .741              |      |
| MGF_Z3                 | =V79 | =         | .956 F1   | +        | .624 F2 + .212 E79 | .955              |      |
| INTER_GF=F1            | =    | .000*V999 | -         | .678*F10 | +                  | .640 D1 - .036*D9 |      |
|                        |      |           | -         | .288*D11 | -                  | .216*D12          | .591 |
| SLOPE_GF=F2            | =    | .000*V999 | +         | .266*F10 | +                  | .900 D2 + .185*D9 |      |
|                        |      |           | +         | .244*D11 | +                  | .163*D12          | .190 |
| E                      | =F9  | =         | .029*F10  | +        | 1.000 D9           |                   | .001 |
| P                      | =F11 | =         | -.598*F10 | +        | .802 D11           |                   | .357 |
| N                      | =F12 | =         | -.643*F10 | +        | .766 D12           |                   | .414 |

GOODNESS OF FIT SUMMARY FOR METHOD = ML

|             |        |              |         |
|-------------|--------|--------------|---------|
| MODEL AIC = | -7.286 | MODEL CAIC = | -61.921 |
|-------------|--------|--------------|---------|

CHI-SQUARE = 16.714 BASED ON 12 DEGREES OF FREEDOM  
 PROBABILITY VALUE FOR THE CHI-SQUARE STATISTIC IS .16067

FIT INDICES (BASED ON COVARIANCE MATRIX ONLY, NOT THE MEANS)

|                                                 |       |       |
|-------------------------------------------------|-------|-------|
| COMPARATIVE FIT INDEX (CFI)                     | =     | .997  |
| ROOT MEAN-SQUARE ERROR OF APPROXIMATION (RMSEA) | =     | .073  |
| 90% CONFIDENCE INTERVAL OF RMSEA (              | .026, | .119) |

|                                                   |            |                       |
|---------------------------------------------------|------------|-----------------------|
| SATORRA-BENTLER SCALED CHI-SQUARE =               | 16.2722 ON | 12 DEGREES OF FREEDOM |
| PROBABILITY VALUE FOR THE CHI-SQUARE STATISTIC IS | .17908     |                       |
| COMPARATIVE FIT INDEX (CFI)                       | =          | .965                  |
| ROOT MEAN-SQUARE ERROR OF APPROXIMATION (RMSEA)   | =          | .037                  |
| 90% CONFIDENCE INTERVAL OF RMSEA (                | .000,      | .078)                 |

# Latent Transition Analysis

## Model 3: Personality Influences on Cognitive Transition

```

CATEGORICAL = Mat1 Mat2 Prop1 Prop2 Form2_1 Form2_2;
USEVARIABLES = Mat1 Mat2 Prop1 Prop2 Form2_1 Form2_2
P1 N1 E1 L1;

```

```

CLASSES = c1 (2) c2 (2);
ANALYSIS: TYPE = MIXTURE;
STARTS = 20 10;
MODEL: %OVERALL%
[c2#1] (a);
c2 ON c1 P1 E1 N1 L1 (b);
c1 ON P1 E1 N1 L1;

MODEL c1: %c1#1%
[Mat1$1 Prop1$1*-3 Scien_1$1] (1-3);
%c1#2%
[Mat1$1 Prop1$1*-3 Scien_1$1] (4-6);
MODEL c2: %c2#1%
[Mat2$1*-5 Prop2$1 Scien_2$1] (1-3);
%c2#2%
[Mat2$1*-5 Prop2$1 Scien_2$1] (4-6);

```

#### **Model 4: Cognitive Influences on Personality Transition**

```

CATEGORICAL = P1L N1L L1L P2L N2L L2L;
USEVARIABLES = P1L N1L L1L P2L N2L L2L
GF;

CLASSES = c1 (2) c2 (2);
DEFINE:
GF = (Mat1 + Prop1 + Form2_1)/3;
ANALYSIS: TYPE = MIXTURE;
STARTS = 100 20;
MODEL: %OVERALL%
[c2#1] (a);
c2 ON c1 (b);
c1 ON GF;

MODEL c1: %c1#1%
[P1L$1 N1L$1 L1L$1];
c2 ON GF;
%c1#2%
[P1L$1 N1L$1 L1L$1];
c2 ON GF;
MODEL c2: %c2#1%
[P2L$1 N2L$1 L2L$1];

%c2#2%
[P2L$1 N2L$1 L2L$1];

```

## STUDY 2

### Model 1: Model specifying the correlation between Gf at second testing wave and GFP

VARIABLES

F1=Gf2;  
F2=GFP;  
  
F20=SPEED2;  
F21=ATCON2;  
F22=WM2;  
F23=RAV2;  
F24=MATH2;  
F151=STA-A;  
F152=PLA-B;

/EQUATIONS

E = F152 + E268;  
A = F151 + E269;  
C = \*F151 + E270;  
N = \*F151 + E271;  
O = \*F152 + E272;  
  
Sp1\_2 = \*F20 + E64;  
Sp2\_2 = F20 + E62;  
  
DAT1\_2 = F21 + E77;  
DAT2\_2 = \*F21 + E78;  
SAT1\_2 = \*F21 + E80;  
  
FDS\_2 = \*F22 + E29;  
BDS\_2 = F22 + E30;  
  
RAV\_A2 = \*F23 + E47;  
RAV\_B2 = F23 + E48;  
RAV\_C2 = \*F23 + E49;  
RAV\_D2 = \*F23 + E50;  
RAV\_E2 = \*F23 + E51;  
  
ARI\_2 = \*F24 + E54;  
PRO\_2 = F24 + E56;  
ALG\_2 = \*F24 + E57;  
  
F20 = F1 + D20;  
F21 = \*F1 + D21;  
F22 = \*F1 + D22;  
F23 = \*F1 + D23;  
F24 = \*F1 + D24;  
  
F151= \*F2 + D151;  
F152= F2 + D152;

/VARIANCES

F1 TO F2=\*;

All error variances and factor disturbances were free to be estimated.

# /COVARIANCES

F1, F2=\*;

## STANDARDIZED SOLUTION FOR THE MODEL ABOVE:

R-SQUARED

|         |       |   |        |      |   |      |      |       |
|---------|-------|---|--------|------|---|------|------|-------|
| FDS_2   | =V29  | = | .810*  | F22  | + | .586 | E29  | .657  |
| BDS_2   | =V30  | = | .851   | F22  | + | .526 | E30  | .724  |
| RAV_A_2 | =V47  | = | .557*  | F23  | + | .831 | E47  | .310  |
| RAV_B_2 | =V48  | = | .736   | F23  | + | .677 | E48  | .542  |
| RAV_C_2 | =V49  | = | .882*  | F23  | + | .471 | E49  | .778  |
| RAV_D_2 | =V50  | = | .861*  | F23  | + | .508 | E50  | .742  |
| RAV_E_2 | =V51  | = | .829*  | F23  | + | .559 | E51  | .687  |
| PROP_2  | =V54  | = | .801*  | F24  | + | .598 | E54  | .642  |
| ARITH_2 | =V56  | = | .757   | F24  | + | .654 | E56  | .573  |
| ALG_2   | =V58  | = | .915*  | F24  | + | .403 | E57  | .837  |
| SP1_2   | =V62  | = | .779   | F20  | + | .627 | E62  | .607  |
| SP2_2   | =V64  | = | .753*  | F20  | + | .658 | E64  | .567  |
| DAT_LH2 | =V77  | = | .770   | F21  | + | .638 | E77  | .594  |
| DAT_RH2 | =V78  | = | .980*  | F21  | + | .199 | E78  | .960  |
| S_ATT2  | =V80  | = | .447*  | F21  | + | .895 | E80  | .200  |
| E       | =V268 | = | .655   | F152 | + | .755 | E268 | .429  |
| A       | =V269 | = | .484   | F151 | + | .875 | E269 | .235  |
| C       | =V270 | = | .090*  | F151 | + | .996 | E270 | .008  |
| N       | =V271 | = | .329*  | F151 | + | .944 | E271 | .108  |
| O       | =V272 | = | .495*  | F152 | + | .869 | E272 | .245  |
| SPEED2  | =F20  | = | .949   | F1   | + | .316 | D20  | .900  |
| SELATT2 | =F21  | = | .856*  | F1   | + | .517 | D21  | .733  |
| WM2     | =F22  | = | .809*  | F1   | + | .588 | D22  | .654  |
| RAV2    | =F23  | = | .847*  | F1   | + | .532 | D23  | .717  |
| MATH2   | =F24  | = | .953*  | F1   | + | .302 | D24  | .909  |
| STA-A   | =F151 | = | 1.000* | F2   | + | .000 | D151 | 1.000 |
| PLA-B   | =F152 | = | 1.000  | F2   | + | .000 | D152 | 1.000 |

## CORRELATIONS AMONG INDEPENDENT VARIABLES

-----

| V   |            | F      |
|-----|------------|--------|
| --- |            | ---    |
|     | I F2 - Gf2 | .347*I |
|     | I F1 - GFP | I      |
|     | I          | I      |

## GOODNESS OF FIT SUMMARY FOR METHOD = ML

|                                                   |         |              |                        |
|---------------------------------------------------|---------|--------------|------------------------|
| MODEL AIC =                                       | 278.280 | MODEL CAIC = | -539.221               |
| CHI-SQUARE =                                      | 600.280 | BASED ON     | 161 DEGREES OF FREEDOM |
| PROBABILITY VALUE FOR THE CHI-SQUARE STATISTIC IS | .00000  |              |                        |

|                                                 |       |       |
|-------------------------------------------------|-------|-------|
| COMPARATIVE FIT INDEX (CFI)                     | =     | .908  |
| ROOT MEAN-SQUARE ERROR OF APPROXIMATION (RMSEA) | =     | .079  |
| 90% CONFIDENCE INTERVAL OF RMSEA (              | .072, | .086) |

## RELIABILITY COEFFICIENTS

-----

|                             |   |      |
|-----------------------------|---|------|
| CRONBACH'S ALPHA            | = | .651 |
| RELIABILITY COEFFICIENT RHO | = | .816 |

**Model 2: Mediation of  $\alpha$ - and  $\beta$ - personality factors, standing for stability and plasticity, between processing and representational efficiency and first and second testing**

VARIABLES

F10=SPEED1;  
F11=SELATT1;  
F20=speed2;  
F21=SELATT2;

F12=WM1;  
F22=WM2;

F13=RAV1;  
F14=MATH1;

F23=RAV2;  
F24=MATH2;

F151=STA-A;  
F152=PLA-B;

F100=PrEf1;  
F200=RIP1;  
F300=PrEf2;  
F400=RIP2;

/EQUATIONS

V63 = \*F10 + E63;  
V61 = F10 + E61;

V75 = \*F11 + E75;  
V76 = F11 + E76;  
V79 = \*F11 + E79;

V27 = \*F12 + E27;  
V28 = F12 + E28;

V41 = \*F13 + E41;  
V42 = F13 + E42;  
V43 = \*F13 + E43;  
V44 = \*F13 + E44;  
V45 = \*F13 + E45;

V53 = \*F14 + E53;  
V55 = F14 + E55;  
V57 = \*F14 + E57;

V268 = F152 + E268;  
V269 = F151 + E269;  
V270 = \*F151 + E270;  
V271 = \*F151 + E271;  
V272 = \*F152 + E272;

V64 = \*F20 + E64;

$V62 = F20 + E62;$   
 $V77 = *F21 + E77;$   
 $V78 = F21 + E78;$   
 $V80 = *F21 + E80;$   
 $V29 = *F22 + E29;$   
 $V30 = F22 + E30;$   
 $V47 = *F23 + E47;$   
 $V48 = F23 + E48;$   
 $V49 = *F23 + E49;$   
 $V50 = *F23 + E50;$   
 $V51 = *F23 + E51;$   
 $V54 = *F24 + E54;$   
 $V56 = F24 + E56;$   
 $V58 = *F24 + E57;$   
 $F10 = *F100 + D10;$   
 $F11 = F100 + D11;$   
 $F12 = *F200 + D12;$   
 $F13 = *F200 + D13;$   
 $F14 = F200 + D14;$   
 $F20 = F300 + D20;$   
 $F21 = *F300 + D21;$   
 $F22 = *F400 + D22;$   
 $F23 = F400 + D23;$   
 $F24 = *F400 + D24;$   
 $F151 = *F100 + *F200 + D151;$   
 $F152 = *F100 + *F200 + D152;$   
 $F300 = *F151 + *F152 + D300;$   
 $F400 = *F151 + 0F152 + D400;$

STANDARDIZED SOLUTION:

R-SQUARED

|         |        |          |   |          |      |
|---------|--------|----------|---|----------|------|
| FDS_1   | =V27 = | .760*F12 | + | .650 E27 | .578 |
| BDS_1   | =V28 = | .836 F12 | + | .549 E28 | .698 |
| FDS_2   | =V29 = | .791*F22 | + | .612 E29 | .626 |
| BDS_2   | =V30 = | .812 F22 | + | .584 E30 | .659 |
| RAV_A_1 | =V41 = | .719*F13 | + | .695 E41 | .517 |
| RAV_B_1 | =V42 = | .770 F13 | + | .638 E42 | .593 |
| RAV_C_1 | =V43 = | .877*F13 | + | .481 E43 | .768 |
| RAV_D_1 | =V44 = | .849*F13 | + | .528 E44 | .721 |
| RAV_E_1 | =V45 = | .822*F13 | + | .569 E45 | .676 |
| RAV_A_2 | =V47 = | .553*F23 | + | .833 E47 | .305 |
| RAV_B_2 | =V48 = | .768 F23 | + | .640 E48 | .590 |
| RAV_C_2 | =V49 = | .882*F23 | + | .472 E49 | .777 |
| RAV_D_2 | =V50 = | .859*F23 | + | .512 E50 | .738 |
| RAV_E_2 | =V51 = | .808*F23 | + | .590 E51 | .652 |
| PROP_1  | =V53 = | .733*F14 | + | .680 E53 | .538 |
| PROP_2  | =V54 = | .697*F24 | + | .717 E54 | .486 |
| ARITH_1 | =V55 = | .756 F14 | + | .655 E55 | .571 |
| ARITH_2 | =V56 = | .755 F24 | + | .656 E56 | .569 |



|         |         |            |   |           |   |           |
|---------|---------|------------|---|-----------|---|-----------|
| ALG_1   | =V57 =  | .950*F14   | + | .313 E57  |   | .902      |
| ALG_2   | =V58 =  | .947*F24   | + | .321 E57  |   | .897      |
| SP1_1   | =V61 =  | .811 F10   | + | .585 E61  |   | .658      |
| SP2_2   | =V62 =  | .812 F20   | + | .584 E62  |   | .659      |
| SP2_1   | =V63 =  | .739*F10   | + | .674 E63  |   | .546      |
| SP2_2   | =V64 =  | .791*F20   | + | .611 E64  |   | .626      |
| DAT_LH1 | =V75 =  | .791*F11   | + | .612 E75  |   | .625      |
| DAT_RH1 | =V76 =  | .968 F11   | + | .250 E76  |   | .937      |
| DAT_LH2 | =V77 =  | .759*F21   | + | .651 E77  |   | .576      |
| DAT_RH2 | =V78 =  | .969 F21   | + | .246 E78  |   | .939      |
| S_ATT1  | =V79 =  | .512*F11   | + | .859 E79  |   | .262      |
| S_ATT2  | =V80 =  | .439*F21   | + | .898 E80  |   | .193      |
| E       | =V268 = | .320 F152  | + | .947 E268 |   | .103      |
| A       | =V269 = | .134 F151  | + | .991 E269 |   | .018      |
| C       | =V270 = | -.232*F151 | + | .973 E270 |   | .054      |
| N       | =V271 = | .180*F151  | + | .984 E271 |   | .033      |
| O       | =V272 = | .084*F152  | + | .996 E272 |   | .007      |
| SPEED1  | =F10 =  | .984*F100  | + | .179 D10  |   | .968      |
| SELATT1 | =F11 =  | .956 F100  | + | .294 D11  |   | .914      |
| WM1     | =F12 =  | .858*F200  | + | .514 D12  |   | .736      |
| RAV1    | =F13 =  | .907*F200  | + | .421 D13  |   | .823      |
| MATH1   | =F14 =  | .931 F200  | + | .364 D14  |   | .868      |
| SPEED2  | =F20 =  | .948 F300  | + | .320 D20  |   | .898      |
| SELATT2 | =F21 =  | .981*F300  | + | .196 D21  |   | .962      |
| WM2     | =F22 =  | .864*F400  | + | .503 D22  |   | .747      |
| RAV2    | =F23 =  | .918 F400  | + | .397 D23  |   | .843      |
| MATH2   | =F24 =  | .934*F400  | + | .358 D24  |   | .872      |
| STA-A   | =F151=  | .074*F100  | + | .939*F200 | + | .039 D151 |
| PLA-B   | =F152=  | .929*F100  | + | .087*F200 | + | .017 D152 |
| PREF2   | =F300=  | -.022*F151 | + | .960*F152 | + | .337 D300 |
| RIP2    | =F400=  | 1.000*F151 | + | .006 D400 |   | 1.000     |

CORRELATIONS AMONG INDEPENDENT VARIABLES

-----

| V            | F      |
|--------------|--------|
| ---          | ---    |
| I F200- RIP1 | .800*I |
| I F100-PREF1 | I      |
| I            | I      |

GOODNESS OF FIT SUMMARY FOR METHOD = ML

MODEL AIC = 751.868 MODEL CAIC = -2009.120

CHI-SQUARE = 1839.868 BASED ON 544 DEGREES OF FREEDOM  
PROBABILITY VALUE FOR THE CHI-SQUARE STATISTIC IS .00000

COMPARATIVE FIT INDEX (CFI) = .891  
ROOT MEAN-SQUARE ERROR OF APPROXIMATION (RMSEA) = .074  
90% CONFIDENCE INTERVAL OF RMSEA ( .070, .078)

RELIABILITY COEFFICIENTS

-----

CRONBACH'S ALPHA = .826  
RELIABILITY COEFFICIENT RHO = .845

**Model 3: Mediation the Big Five personality factors, standing for stability and plasticity, between processing and representational efficiency and first and second testing**

STANDARDIZED SOLUTION:

R-SQUARED

|         |        |           |   |           |      |
|---------|--------|-----------|---|-----------|------|
| FDS_1   | =V27 = | .765*F12  | + | .644 E27  | .585 |
| BDS_1   | =V28 = | .825 F12  | + | .565 E28  | .680 |
| FDS_2   | =V29 = | .803*F22  | + | .597 E29  | .644 |
| BDS_2   | =V30 = | .811 F22  | + | .585 E30  | .658 |
| RAV_A_1 | =V41 = | .724*F13  | + | .690 E41  | .524 |
| RAV_B_1 | =V42 = | .782 F13  | + | .623 E42  | .611 |
| RAV_C_1 | =V43 = | .882*F13  | + | .471 E43  | .778 |
| RAV_D_1 | =V44 = | .854*F13  | + | .521 E44  | .729 |
| RAV_E_1 | =V45 = | .795*F13  | + | .607 E45  | .631 |
| RAV_A_2 | =V47 = | .567*F23  | + | .824 E47  | .321 |
| RAV_B_2 | =V48 = | .787 F23  | + | .617 E48  | .619 |
| RAV_C_2 | =V49 = | .889*F23  | + | .457 E49  | .791 |
| RAV_D_2 | =V50 = | .869*F23  | + | .494 E50  | .756 |
| RAV_E_2 | =V51 = | .787*F23  | + | .616 E51  | .620 |
| PROP_1  | =V53 = | .711*F14  | + | .703 E53  | .506 |
| PROP_2  | =V54 = | .761*F24  | + | .649 E54  | .579 |
| ARITH_1 | =V55 = | .806 F14  | + | .592 E55  | .649 |
| ARITH_2 | =V56 = | .790 F24  | + | .613 E56  | .624 |
| ALG_1   | =V57 = | .899*F14  | + | .438 E57  | .809 |
| ALG_1   | =V58 = | .882*F24  | + | .472 E58  | .778 |
| SP1_1   | =V61 = | .804 F10  | + | .594 E61  | .647 |
| SP2_2   | =V62 = | .798 F20  | + | .602 E62  | .638 |
| SP2_1   | =V63 = | .724*F10  | + | .689 E63  | .525 |
| SP2_2   | =V64 = | .769*F20  | + | .639 E64  | .592 |
| DAT_LH1 | =V75 = | .780*F11  | + | .626 E75  | .608 |
| DAT_RH1 | =V76 = | .969 F11  | + | .246 E76  | .940 |
| DAT_LH2 | =V77 = | .755*F21  | + | .656 E77  | .570 |
| DAT_RH2 | =V78 = | .978 F21  | + | .210 E78  | .956 |
| S_ATT1  | =V79 = | .513*F11  | + | .858 E79  | .263 |
| S_ATT2  | =V80 = | .446*F21  | + | .895 E80  | .199 |
| E       | =V268= | .999 F701 | + | .047 E268 | .998 |

|       |        |        |       |      |       |       |      |           |           |      |
|-------|--------|--------|-------|------|-------|-------|------|-----------|-----------|------|
| A     | =V269= | .999   | F702  | +    | .049  | E269  |      | .998      |           |      |
| C     | =V270= | .999   | F703  | +    | .044  | E270  |      | .998      |           |      |
| N     | =V271= | .999   | F704  | +    | .044  | E271  |      | .998      |           |      |
| O     | =V272= | .998   | F705  | +    | .057  | E272  |      | .997      |           |      |
| F10   | =F10 = | .934*  | F100  | +    | .358  | D10   |      | .872      |           |      |
| F11   | =F11 = | .835   | F100  | +    | .551  | D11   |      | .697      |           |      |
| F12   | =F12 = | .847*  | F200  | +    | .532  | D12   |      | .717      |           |      |
| F13   | =F13 = | .837*  | F200  | +    | .547  | D13   |      | .701      |           |      |
| F14   | =F14 = | .962   | F200  | +    | .274  | D14   |      | .925      |           |      |
| F20   | =F20 = | .939   | F300  | +    | .343  | D20   |      | .882      |           |      |
| F21   | =F21 = | .935*  | F300  | +    | .353  | D21   |      | .875      |           |      |
| F22   | =F22 = | .856*  | F400  | +    | .517  | D22   |      | .732      |           |      |
| F23   | =F23 = | .875   | F400  | +    | .485  | D23   |      | .765      |           |      |
| F24   | =F24 = | 1.000* | F400  | +    | .023  | D24   |      | .999      |           |      |
| RIP1  | =F200= | 1.000* | F100  | +    | .024  | D200  |      | .999      |           |      |
| PREF2 | =F300= | .366   | D300  | -    | .296* | D701  | +    | .366*D702 |           |      |
|       |        | -      | .256* | D703 | +     | .264* | D704 | +         | .714*D705 |      |
| RIP2  | =F400= | .160   | D400  | -    | .381* | D701  | +    | .333*D702 |           |      |
|       |        | -      | .264* | D703 | +     | .351* | D704 | +         | .725*D705 |      |
| E     | =F701= | .527*  | F100  | +    | .212* | D200  | +    | .823      | D701      | .322 |
| A     | =F702= | -.169* | F100  | +    | .322* | D200  | +    | .932      | D702      | .132 |
| C     | =F703= | -.023* | F100  | +    | .243* | D200  | +    | .970      | D703      | .059 |
| N     | =F704= | -.139* | F100  | +    | .161* | D200  | +    | .977      | D704      | .045 |
| O     | =F705= | -.058* | F100  | +    | .977* | D200  | +    | .207      | D705      | .957 |

GOODNESS OF FIT SUMMARY FOR METHOD = ML

CHI-SQUARE = 3657.281 BASED ON 568 DEGREES OF FREEDOM  
 PROBABILITY VALUE FOR THE CHI-SQUARE STATISTIC IS .00000

#### FIT INDICES

COMPARATIVE FIT INDEX (CFI) = .996  
 ROOT MEAN-SQUARE ERROR OF APPROXIMATION (RMSEA) = .112  
 90% CONFIDENCE INTERVAL OF RMSEA ( .108, .115)

#### RELIABILITY COEFFICIENTS

-----  
 CRONBACH'S ALPHA = .837

**Latent transition analysis examining the effect of personality factors in cognitive transition across the two testing waves.**

**Model 4: Personality influencing cognitive transition**

```
CATEGORICAL = ar_cl1 ar_cl2 alg_cl1 alg_cl2 pro_cl1 pro_cl2 rav_cl1 rav_cl2;

USEVARIABLES = ar_cl1 ar_cl2
               alg_cl1 alg_cl2
               pro_cl1 pro_cl2
               rav_cl1 rav_cl2
               nstrincl bds_1
               A_PERS B_PERS;

CLASSES = c1 (2) c2 (2);

ANALYSIS: TYPE = MIXTURE;
STARTS = 100 50;
MODEL: %OVERALL%
[c2#1] (a);
c2 ON c1 (b);

c1 ON nstrincl bds_1 A_PERS B_PERS;

MODEL c1: %c1#1%
[ar_cl1$1 alg_cl1$1 pro_cl1$1 rav_cl1$1] (1-4);
c2 ON nstrincl bds_1 A_PERS B_PERS;
%c1#2%
[ar_cl1$1 alg_cl1$1 pro_cl1$1 rav_cl1$1] (5-8);
c2 ON nstrincl bds_1 A_PERS B_PERS;
MODEL c2: %c2#1%
[ar_cl2$1 alg_cl2$1 pro_cl2$1 rav_cl2$1] (1-4);

%c2#2%
[ar_cl2$1 alg_cl2$1 pro_cl2$1 rav_cl2$1] (5-8);
```

### STUDY 3

**Model 1: The model specifying relations between Gf, GFP, and EI after partialing out the effect of likeability.**

VARIABLES

V347=LIKEABILITY;

F1=COGN;

F2=GFP;

F3=G;

F4=SCH;

F11=GF;

F12=COGN\_SSS;

F13=COGN\_S;

F14=SEA;

F41=GR;

F42=MATH;

F43=SCI;

F21=N;

F22=C;

F23=O;

F24=A;

F25=E;

F31=T\_EI\_SK-C;

F32=T\_EI\_STA;

F33=T\_EI\_SENS;

F34=A\_EI\_REC;

F35=A\_EI\_DEF;

F211=A\_STA;

F212=B\_PLA;

F311=EIt;

F312=EIa;

/EQU

V338= F11+E338;

V339=\*F11+E339;

V340=\*F11+E340;

V341=\*F11+E341;

V342=\*F11+E342;

V297= \*V397+ F12+E297;

V299= \*V397+ \*F12+E299;

V300= \*V397+ \*F12+E300;

V302= \*V397+ \*F12+E302;

V305= \*V397+ \*F12+E305;

V41= \*V397+ F13+E41;

V42= \*V397+ \*F13+E42;

V90= \*V397+ \*F13+E90;

V279= \*V397+ \*F14+E279;

V280= \*V397+ F14+E280;  
V282= \*V397+ \*F14+E282;  
V283= \*V397+ \*F14+E283;

V310= \*V397+ F22+E310;  
V311= \*V397+ \*F22+E311;

V312= \*V397+ F21+E312;  
V313= \*V397+ \*F21+E313;

V314= \*V397+ F25+E314;  
V316= \*V397+ \*F25+E316;

V317= \*V397+ F24+E317;  
V318= \*V397+ \*F24+E318;

V320= \*V397+ F23+E320;  
V321= \*V397+ \*F23+E321;

V196= \*V397+ F31+E196;  
V197= \*V397+ \*F31+E197;  
V199= \*V397+ \*F31+E199;  
V200= \*V397+ \*F31+E200;

V194= \*V397+ F32+E194;  
V187= \*V397+ \*F32+E187;  
V210= \*V397+ \*F32+E210;  
V214= \*V397+ \*F32+E214;

V192= \*V397+ F33+E192;  
V198= \*V397+ \*F33+E198;  
V204= \*V397+ \*F33+E204;  
V205= \*V397+ \*F33+E205;

V369= F34+E369;  
V370= \*F34+E370;  
V371= \*F34+E371;  
V372= \*F34+E372;

V373= F35+E373;  
V374= \*F35+E374;  
V375= \*F35+E375;

F11 = \*F3+D11;

F12 = F1+D12;  
F13 =\*F1+D13;  
F14 =\*F1+D14;

F21 =\*F211+D21;  
F22 =\*F211+D22;  
F23 =\*F212+D23;  
F24 = F211+D24;  
F25 = F212+D25;

F31 =\*F311+D31;  
F32 =\*F311+D32;  
F33 = F311+D33;  
F34 =\*F312+D34;  
F35 = F312+D35;

```
F211=*F2+D211;
F212= F2+D212;
```

```
F311=*F2+D311;
F312= F3+D312;
```

```
/VAR
```

```
F1 TO F3=*;
```

All error variances and factor disturbances were free to be estimated.

```
/COV
```

```
F1 TO F3=*;
```

```
/END
```

| STANDARDIZED SOLUTION: |          |   |           | R-SQUARED  |       |
|------------------------|----------|---|-----------|------------|-------|
| SR1SELFR=V41 =         | .414 F13 | + | .334*V397 | +.847 E41  | .283  |
| SR2SELFR=V42 =         | .557*F13 | + | .277*V397 | +.783 E42  | .387  |
| SR50SELF=V90 =         | .565*F13 | + | .284*V397 | +.775 E90  | .400  |
| EI8 =V187=             | .598*F32 | + | .071*V397 | +.799 E187 | .362  |
| EI13 =V192=            | .633 F33 | + | .135*V397 | +.762 E192 | .419  |
| EI15 =V194=            | .762 F32 | - | .003*V397 | +.648 E194 | .580  |
| EI17 =V196=            | .573 F31 | + | .058*V397 | +.817 E196 | .332  |
| EI18 =V197=            | .623*F31 | + | .136*V397 | +.770 E197 | .407  |
| EI19 =V198=            | .650*F33 | + | .195*V397 | +.734 E198 | .461  |
| EI20 =V199=            | .613*F31 | + | .069*V397 | +.787 E199 | .381  |
| EI21 =V200=            | .486*F31 | + | .203*V397 | +.850 E200 | .277  |
| EI25 =V204=            | .712*F33 | + | .180*V397 | +.678 E204 | .540  |
| EI26 =V205=            | .547*F33 | + | .355*V397 | +.758 E205 | .426  |
| EI31 =V210=            | .584*F32 | + | .073*V397 | +.808 E210 | .346  |
| EI35 =V214=            | .509*F32 | + | .095*V397 | +.855 E214 | .269  |
| SEA_F1 =V279=          | .361*F14 | - | .050*V397 | +.931 E279 | .133  |
| SEA_SD1 =V280=         | .462 F14 | - | .178*V397 | +.869 E280 | .245  |
| SEA_MT5 =V282=         | .339*F14 | - | .170*V397 | +.925 E282 | .144  |
| SEA_S1 =V283=          | .279*F14 | - | .080*V397 | +.957 E283 | .084  |
| SRMATH1 =V297=         | .304 F12 | + | .387*V397 | +.871 E297 | .242  |
| SRSUP1 =V299=          | .771*F12 | + | .219*V397 | +.598 E299 | .642  |
| SRSUP2 =V300=          | .683*F12 | + | .200*V397 | +.702 E300 | .507  |
| SRSOC2 =V302=          | .716*F12 | + | .226*V397 | +.661 E302 | .563  |
| SRSPOR =V305=          | .301*F12 | + | .466*V397 | +.832 E305 | .307  |
| F2ACHIE =V310=         | .645 F22 | + | .234*V397 | +.727 E310 | .471  |
| F2ORG =V311=           | .953*F22 | + | .179*V397 | +.246 E311 | .939  |
| F1EMO =V312=           | .485 F21 | - | .065*V397 | +.872 E312 | .239  |
| F1EGO =V313=           | .998*F21 | - | .063*V397 | +.000 E313 | 1.000 |
| F5PROS =V314=          | .704 F25 | + | .068*V397 | +.707 E314 | .500  |
| F5EXT =V316=           | .724*F25 | + | .204*V397 | +.659 E316 | .566  |
| F4HELP =V317=          | .719 F24 | + | .108*V397 | +.687 E317 | .528  |
| F4AGR =V318=           | .898*F24 | + | .083*V397 | +.431 E318 | .814  |
| F3INTE =V320=          | .925 F23 | + | .378*V397 | +.042 E320 | .998  |
| F3OPEN =V321=          | .476*F23 | + | .186*V397 | +.859 E321 | .262  |
| SPATIAL =V338=         | .604 F11 | + | .797 E338 |            | .365  |
| QUANT =V339=           | .644*F11 | + | .765 E339 |            | .415  |
| CAUSAL =V340=          | .791*F11 | + | .612 E340 |            | .625  |
| QUAL =V341=            | .601*F11 | + | .799 E341 |            | .362  |
| SOCIAL =V342=          | .601*F11 | + | .799 E342 |            | .361  |
| TCWL =V369=            | .441 F34 | + | .898 E369 |            | .194  |
| PEGD =V370=            | .594*F34 | + | .804 E370 |            | .353  |

|           |        |            |   |       |      |      |
|-----------|--------|------------|---|-------|------|------|
| COMEM     | =V371= | .773*F34   | + | .635  | E371 | .597 |
| STORY     | =V372= | .523*F34   | + | .852  | E372 | .274 |
| FAC_JOY   | =V373= | .444 F35   | + | .896  | E373 | .197 |
| FAC_GRIF  | =V374= | .558*F35   | + | .830  | E374 | .311 |
| FAC_SURP  | =V375= | .823*F35   | + | .568  | E375 | .678 |
| GF        | =F11 = | .833*F3    | + | .554  | D11  | .693 |
| COGN_SSS  | =F12 = | .994 F1    | + | .112  | D12  | .987 |
| COGN_S    | =F13 = | .364*F1    | + | .931  | D13  | .133 |
| SEA       | =F14 = | .808*F1    | + | .589  | D14  | .654 |
| N         | =F21 = | .027*F211  | + | 1.000 | D21  | .001 |
| C         | =F22 = | .667*F211  | + | .745  | D22  | .445 |
| O         | =F23 = | .589*F212  | + | .808  | D23  | .347 |
| A         | =F24 = | .677 F211  | + | .736  | D24  | .459 |
| E         | =F25 = | .509 F212  | + | .861  | D25  | .259 |
| T_EI_SR   | =F31 = | .870*F311  | + | .493  | D31  | .757 |
| T_EI_STA  | =F32 = | -.240*F311 | + | .971  | D32  | .057 |
| T_EI_Esis | =F33=  | .706 F311  | + | .709  | D33  | .498 |
| A_EI_Spe  | =F34 = | .934*F312  | + | .358  | D34  | .872 |
| A_EI_Det  | =F35 = | .678 F312  | + | .735  | D35  | .460 |
| A_STA     | =F211= | .920*F2    | + | .393  | D211 | .846 |
| B_PLA     | =F212= | .995 F2    | + | .097  | D212 | .991 |
| EIt       | =F311= | .671*F2    | + | .741  | D311 | .451 |
| EIa       | =F312= | .994 F3    | + | .105  | D312 | .989 |

# CORRELATIONS AMONG INDEPENDENT VARIABLES

-----

| V          | F      |
|------------|--------|
| ---        | ---    |
| I F2 - GFP | .620*I |
| I F1 - E1  | I      |
| I          | I      |
| I F3 - G   | .665*I |
| I F1 - E1  | I      |
| I          | I      |
| I F3 - G   | .420*I |
| I F2 - GFP | I      |
| I          | I      |

## GOODNESS OF FIT SUMMARY FOR METHOD = ML

MODEL AIC = 38.106 MODEL CAIC = -4602.386  
 CHI-SQUARE = 2098.106 BASED ON 1030 DEGREES OF FREEDOM  
 PROBABILITY VALUE FOR THE CHI-SQUARE STATISTIC IS .00000

COMPARATIVE FIT INDEX (CFI) = .992  
 ROOT MEAN-SQUARE ERROR OF APPROXIMATION (RMSEA) = .065  
 90% CONFIDENCE INTERVAL OF RMSEA ( .061, .069)

## RELIABILITY COEFFICIENTS

-----

CRONBACH'S ALPHA = .815

## Model 2: Bottom-up mediation of cognizance between cognitive and personality factors.

### STANDARDIZED SOLUTION:

### R-SQUARED

|                |          |   |          |      |
|----------------|----------|---|----------|------|
| SR1SELFR=V41 = | .234 F13 | + | .972 E41 | .055 |
| SR2SELFR=V42 = | .392*F13 | + | .920 E42 | .154 |
| SR50SELF=V90 = | .999*F13 | + | .034 E90 | .999 |



|          |        |           |   |          |      |          |   |          |      |
|----------|--------|-----------|---|----------|------|----------|---|----------|------|
| EI8      | =V187= | .620*F32  | + | .785     | E187 | .384     |   |          |      |
| EI13     | =V192= | .657 F33  | + | .753     | E192 | .432     |   |          |      |
| EI15     | =V194= | .747 F32  | + | .665     | E194 | .557     |   |          |      |
| EI17     | =V196= | .614 F31  | + | .790     | E196 | .377     |   |          |      |
| EI18     | =V197= | .622*F31  | + | .783     | E197 | .387     |   |          |      |
| EI19     | =V198= | .650*F33  | + | .760     | E198 | .423     |   |          |      |
| EI20     | =V199= | .645*F31  | + | .764     | E199 | .416     |   |          |      |
| EI21     | =V200= | .480*F31  | + | .877     | E200 | .231     |   |          |      |
| EI25     | =V204= | .778*F33  | + | .628     | E204 | .605     |   |          |      |
| EI26     | =V205= | .606*F33  | + | .796     | E205 | .367     |   |          |      |
| EI31     | =V210= | .574*F32  | + | .819     | E210 | .330     |   |          |      |
| EI35     | =V214= | .500*F32  | + | .866     | E214 | .250     |   |          |      |
| HAI_F1   | =V279= | .407 F14  | + | .914     | E279 | .165     |   |          |      |
| HAI_SD1  | =V280= | .521*F14  | + | .853     | E280 | .272     |   |          |      |
| HAI_MT5  | =V282= | .352*F14  | + | .936     | E282 | .124     |   |          |      |
| HAI_S1   | =V283= | .281*F14  | + | .960     | E283 | .079     |   |          |      |
| BOTTLE   | =V285= | .738 F1   | + | .674     | E285 | .545     |   |          |      |
| CAR      | =V286= | .508*F1   | + | .861     | E286 | .258     |   |          |      |
| NA       | =V288= | .535 F2   | + | .845     | E288 | .287     |   |          |      |
| NS       | =V289= | .691*F2   | + | .723     | E289 | .477     |   |          |      |
| SEEDS    | =V290= | .660 F3   | + | .751     | E290 | .435     |   |          |      |
| COMB     | =V291= | .566*F3   | + | .824     | E291 | .321     |   |          |      |
| MAT_1    | =V292= | .439 F4   | + | .899     | E292 | .193     |   |          |      |
| MAT_2    | =V293= | .747*F4   | + | .665     | E293 | .557     |   |          |      |
| SOC_A    | =V295= | .812 F5   | + | .583     | E295 | .660     |   |          |      |
| SOC_B    | =V296= | .687*F5   | + | .727     | E296 | .472     |   |          |      |
| MATH1    | =V297= | .384 F12  | + | .923     | E297 | .147     |   |          |      |
| SUP1     | =V299= | .784*F12  | + | .620     | E299 | .615     |   |          |      |
| SUP2     | =V300= | .726*F12  | + | .688     | E300 | .527     |   |          |      |
| SOC2     | =V302= | .731*F12  | + | .682     | E302 | .535     |   |          |      |
| SPOR     | =V305= | .413*F12  | + | .911     | E305 | .171     |   |          |      |
| F2ACHIE  | =V310= | .716 F22  | + | .698     | E310 | .513     |   |          |      |
| F2ORG    | =V311= | .932*F22  | + | .363     | E311 | .868     |   |          |      |
| F1EMO    | =V312= | .999 F21  | + | .036     | E312 | .999     |   |          |      |
| F1EGO    | =V313= | .484*F21  | + | .875     | E313 | .235     |   |          |      |
| F5PROS   | =V314= | .689 F25  | + | .724     | E314 | .475     |   |          |      |
| F5EXT    | =V316= | .751*F25  | + | .660     | E316 | .564     |   |          |      |
| F4HELP   | =V317= | .729 F24  | + | .685     | E317 | .531     |   |          |      |
| F4AGR    | =V318= | .877*F24  | + | .480     | E318 | .769     |   |          |      |
| F3INTE   | =V320= | .823 F23  | + | .568     | E320 | .677     |   |          |      |
| F3OPEN   | =V321= | .583*F23  | + | .813     | E321 | .339     |   |          |      |
| TCWL     | =V369= | .376 F34  | + | .926     | E369 | .142     |   |          |      |
| PEGD     | =V370= | .596*F34  | + | .803     | E370 | .356     |   |          |      |
| COMEM    | =V371= | .788*F34  | + | .616     | E371 | .621     |   |          |      |
| STORY    | =V372= | .530*F34  | + | .848     | E372 | .280     |   |          |      |
| FAC_JOY  | =V373= | .440 F35  | + | .898     | E373 | .194     |   |          |      |
| FAC_GRIF | =V374= | .521*F35  | + | .854     | E374 | .271     |   |          |      |
| FAC_SURP | =V375= | .885*F35  | + | .466     | E375 | .783     |   |          |      |
| SPAC     | =F1 =  | .572*F10  | + | .820     | D1   | .327     |   |          |      |
| QUA      | =F2 =  | .964*F10  | + | .267     | D2   | .929     |   |          |      |
| EXP      | =F3 =  | 1.000*F10 | + | .000     | D3   | 1.000    |   |          |      |
| IND_M    | =F4 =  | .894 F10  | + | .447     | D4   | .800     |   |          |      |
| SOCI     | =F5 =  | .848*F10  | + | .530     | D5   | .719     |   |          |      |
| G        | =F10 = | .871*V3   | + | .491     | D10  | .759     |   |          |      |
| COGN_SSS | =F12 = | .910*F20  | + | .415     | D12  | .828     |   |          |      |
| COGN_S   | =F13 = | .414*F20  | + | .910     | D13  | .171     |   |          |      |
| HA_EV    | =F14 = | .549 F20  | + | .836     | D14  | .302     |   |          |      |
| COGN     | =F20 = | .302*F10  | + | .122*D1  | +    | .708*D2  | + | .088*D4  |      |
|          |        | + .144*D5 | + | .262 D20 | +    | .233*D34 | + | .492*D35 | .932 |
| N        | =F21 = | -.090*F30 | + | .996     | D21  | .008     |   |          |      |
| C        | =F22 = | .633*F30  | + | .774     | D22  | .400     |   |          |      |
| O        | =F23 = | .733 F30  | + | .680     | D23  | .538     |   |          |      |
| A        | =F24 = | .675*F30  | + | .738     | D24  | .455     |   |          |      |

|          |        |        |     |   |      |     |      |
|----------|--------|--------|-----|---|------|-----|------|
| E        | =F25 = | .533*  | F30 | + | .846 | D25 | .284 |
| GFP      | =F30 = | .720*  | F20 | + | .694 | D30 | .518 |
| T_EI_SK  | =F31 = | .668*  | F30 | + | .744 | D31 | .446 |
| T_EI_STA | =F32 = | -.211* | F30 | + | .977 | D32 | .045 |
| T_EI_SEN | =F33 = | .572*  | F30 | + | .820 | D33 | .327 |
| A_EI_REC | =F34 = | .899*  | F10 | + | .438 | D34 | .808 |
| A_EI_DEF | =F35 = | .501*  | F10 | + | .866 | D35 | .251 |

GOODNESS OF FIT SUMMARY FOR METHOD = ML  
 MODEL AIC = -174.070      MODEL CAIC = -5789.731  
 CHI-SQUARE = 2327.930 BASED ON 1251 DEGREES OF FREEDOM  
 PROBABILITY VALUE FOR THE CHI-SQUARE STATISTIC IS .00000

COMPARATIVE FIT INDEX (CFI) = .997  
 ROOT MEAN-SQUARE ERROR OF APPROXIMATION (RMSEA) = .060  
 90% CONFIDENCE INTERVAL OF RMSEA ( .056, .063)

#### RELIABILITY COEFFICIENTS

-----  
 CRONBACH'S ALPHA = .805

### Model 3: Top-down mediation of cognizance between personality and cognitive factors.

#### STANDARDIZED SOLUTION:

#### R-SQUARED

|                |       |     |   |      |      |      |
|----------------|-------|-----|---|------|------|------|
| SR1SELFR=V41 = | .469  | F13 | + | .883 | E41  | .220 |
| SR2SELFR=V42 = | .857* | F13 | + | .516 | E42  | .734 |
| SR50SELF=V90 = | .453* | F13 | + | .891 | E90  | .206 |
| EI8 =V187=     | .636* | F32 | + | .772 | E187 | .405 |
| EI13 =V192=    | .668  | F33 | + | .744 | E192 | .446 |
| EI15 =V194=    | .734  | F32 | + | .679 | E194 | .539 |
| EI17 =V196=    | .609  | F31 | + | .793 | E196 | .371 |
| EI18 =V197=    | .622* | F31 | + | .783 | E197 | .387 |
| EI19 =V198=    | .636* | F33 | + | .772 | E198 | .404 |
| EI20 =V199=    | .627* | F31 | + | .779 | E199 | .393 |
| EI21 =V200=    | .516* | F31 | + | .856 | E200 | .267 |
| EI25 =V204=    | .782* | F33 | + | .624 | E204 | .611 |
| EI26 =V205=    | .609* | F33 | + | .793 | E205 | .371 |
| EI31 =V210=    | .572* | F32 | + | .820 | E210 | .328 |
| EI35 =V214=    | .511* | F32 | + | .859 | E214 | .261 |
| HAI_F1 =V279=  | .348  | F14 | + | .938 | E279 | .121 |
| HAI_SD1 =V280= | .457* | F14 | + | .889 | E280 | .209 |
| HAI_MT5 =V282= | .443* | F14 | + | .896 | E282 | .196 |
| HAI_S1 =V283=  | .258* | F14 | + | .966 | E283 | .067 |
| BOTTLE =V285=  | .715  | F1  | + | .699 | E285 | .511 |
| CAR =V286=     | .510* | F1  | + | .860 | E286 | .260 |
| NA =V288=      | .501  | F2  | + | .866 | E288 | .251 |
| NS =V289=      | .647* | F2  | + | .762 | E289 | .419 |
| SEEDS =V290=   | .638  | F3  | + | .770 | E290 | .407 |
| COMB =V291=    | .555* | F3  | + | .832 | E291 | .308 |
| MAT_1 =V292=   | .476  | F4  | + | .879 | E292 | .227 |
| MAT_2 =V293=   | .705* | F4  | + | .709 | E293 | .497 |
| SOC_A =V295=   | .805  | F5  | + | .593 | E295 | .649 |
| SOC_B =V296=   | .659* | F5  | + | .752 | E296 | .434 |
| MATH1 =V297=   | .363  | F12 | + | .932 | E297 | .132 |
| SUP1 =V299=    | .780* | F12 | + | .626 | E299 | .608 |
| SUP2 =V300=    | .710* | F12 | + | .705 | E300 | .504 |
| SOC2 =V302=    | .743* | F12 | + | .669 | E302 | .552 |
| SPOR =V305=    | .394* | F12 | + | .919 | E305 | .155 |

|          |        |           |          |           |          |          |          |          |          |
|----------|--------|-----------|----------|-----------|----------|----------|----------|----------|----------|
| F2ACHIE  | =V310= | .743 F22  | +        | .669 E310 |          |          |          |          | .552     |
| F2ORG    | =V311= | .901*F22  | +        | .434 E311 |          |          |          |          | .811     |
| F1EMO    | =V312= | .484 F21  | +        | .875 E312 |          |          |          |          | .235     |
| F1EGO    | =V313= | .999*F21  | +        | .033 E313 |          |          |          |          | .999     |
| F5PROS   | =V314= | .578 F25  | +        | .816 E314 |          |          |          |          | .335     |
| F5EXT    | =V316= | .896*F25  | +        | .445 E316 |          |          |          |          | .802     |
| F4HELP   | =V317= | .681 F24  | +        | .733 E317 |          |          |          |          | .463     |
| F4AGR    | =V318= | .943*F24  | +        | .333 E318 |          |          |          |          | .889     |
| F3INTE   | =V320= | .999 F23  | +        | .043 E320 |          |          |          |          | .998     |
| F3OPEN   | =V321= | .480*F23  | +        | .877 E321 |          |          |          |          | .230     |
| TCWL     | =V369= | .355 F34  | +        | .935 E369 |          |          |          |          | .126     |
| PEGD     | =V370= | .573*F34  | +        | .820 E370 |          |          |          |          | .328     |
| COMEM    | =V371= | .769*F34  | +        | .640 E371 |          |          |          |          | .591     |
| STORY    | =V372= | .503*F34  | +        | .864 E372 |          |          |          |          | .253     |
| FAC_JOY  | =V373= | .418 F35  | +        | .908 E373 |          |          |          |          | .175     |
| FAC_GRIF | =V374= | .526*F35  | +        | .850 E374 |          |          |          |          | .277     |
| FAC_SURP | =V375= | .877*F35  | +        | .480 E375 |          |          |          |          | .769     |
| SPAC     | =F1 =  | .534*F10  | +        | .845 D1   |          |          |          |          | .285     |
| QUA      | =F2 =  | .967*F10  | +        | .255 D2   |          |          |          |          | .935     |
| EXP      | =F3 =  | .994*F10  | +        | .107 D3   |          |          |          |          | .988     |
| IND_M    | =F4 =  | .866 F10  | +        | .499 D4   |          |          |          |          | .751     |
| SOCI     | =F5 =  | .844*F10  | +        | .536 D5   |          |          |          |          | .712     |
| G        | =F10 = | .932*F20  | +        | .362 D10  |          |          |          |          | .869     |
| COGN_SSS | =F12 = | .412*F20  | +        | .911 D12  |          |          |          |          | .170     |
| COGN_S   | =F13 = | -.190*F20 | +        | .982 D13  |          |          |          |          | .036     |
| HA_EV    | =F14 = | .986 F20  | +        | .169 D14  |          |          |          |          | .971     |
| COGN     | =F20 = | -.407*F30 | +        | .171 D20  | +        | .172*D21 | +        | .320*D22 |          |
|          |        | +         | .345*D23 | +         | .434*D24 | +        | .088*D25 | +        | .284*D31 |
|          |        | -         | .437*D32 | +         | .294*D33 |          |          |          | .971     |
| N        | =F21 = | -.091*F30 | +        | .996 D21  |          |          |          |          | .008     |
| C        | =F22 = | .636*F30  | +        | .772 D22  |          |          |          |          | .404     |
| O        | =F23 = | .633 F30  | +        | .774 D23  |          |          |          |          | .401     |
| A        | =F24 = | .535*F30  | +        | .845 D24  |          |          |          |          | .287     |
| E        | =F25 = | .489*F30  | +        | .872 D25  |          |          |          |          | .239     |
| GFP      | =F30 = | -.476*V3  | +        | .880 D30  |          |          |          |          | .226     |
| T_EI_SK  | =F31 = | .567*F30  | +        | .823 D31  |          |          |          |          | .322     |
| T_EI_STA | =F32 = | -.079*F30 | +        | .997 D32  |          |          |          |          | .006     |
| T_EI_SEN | =F33 = | .493*F30  | +        | .870 D33  |          |          |          |          | .243     |
| A_EI_REC | =F34 = | .906*F10  | +        | .423 D34  |          |          |          |          | .821     |
| A_EI_DEF | =F35 = | .520*F10  | +        | .854 D35  |          |          |          |          | .270     |

#### GOODNESS OF FIT SUMMARY FOR METHOD = ML

MODEL AIC = 2.466 MODEL CAIC = -5617.684  
 CHI-SQUARE = 2506.466 BASED ON 1252 DEGREES OF FREEDOM  
 PROBABILITY VALUE FOR THE CHI-SQUARE STATISTIC IS .00000

COMPARATIVE FIT INDEX (CFI) = .996  
 ROOT MEAN-SQUARE ERROR OF APPROXIMATION (RMSEA) = .064  
 90% CONFIDENCE INTERVAL OF RMSEA ( .061, .068)

#### RELIABILITY COEFFICIENTS

-----

CRONBACH'S ALPHA = .805

#### Model 4: Model testing effects on school performance.

##### STANDARDIZED SOLUTION:

##### R-SQUARED

|        |        |          |   |           |  |  |  |  |      |
|--------|--------|----------|---|-----------|--|--|--|--|------|
| SOCIAL | =V342= | .428*F11 | + | .904 E342 |  |  |  |  | .183 |
| TCWL   | =V369= | .420 F34 | + | .908 E369 |  |  |  |  | .176 |

|          |        |            |   |          |      |   |         |     |          |      |
|----------|--------|------------|---|----------|------|---|---------|-----|----------|------|
| PEGD     | =V370= | .607*F34   | + | .795     | E370 |   |         |     |          | .369 |
| COMEM    | =V371= | .671*F34   | + | .741     | E371 |   |         |     |          | .450 |
| STORY    | =V372= | .396*F34   | + | .918     | E372 |   |         |     |          | .157 |
| FAC_JOY  | =V373= | .411 F35   | + | .912     | E373 |   |         |     |          | .169 |
| FAC_GRIF | =V374= | .419*F35   | + | .908     | E374 |   |         |     |          | .175 |
| FAC_SURP | =V375= | .877*F35   | + | .481     | E375 |   |         |     |          | .768 |
| GREEK    | =V376= | .964 F4    | + | .266     | E376 |   |         |     |          | .929 |
| MATHS    | =V377= | .855*F4    | + | .518     | E377 |   |         |     |          | .731 |
| COGN     | =F1 =  | .222*F11   | + | .975     | D1   |   |         |     |          | .049 |
| GFP      | =F2 =  | -.170*F11  | + | .587*D1  |      | + | .792    | D2  |          | .373 |
| GEI      | =F3 =  | .441*F11   | + | .583*D1  |      | + | .452*D2 |     | +.511 D3 | .739 |
| SCH      | =F4 =  | .170*F11   | + | .345*D1  |      | + | .350*D2 |     | +.854 D4 | .271 |
| GF       | =F11 = | .704*V3    | + | .710     | D11  |   |         |     |          | .496 |
| COGN_SSS | =F12 = | .997 F1    | + | .075     | D12  |   |         |     |          | .994 |
| COGN_S   | =F13 = | .349*F1    | + | .937     | D13  |   |         |     |          | .122 |
| HA_EV    | =F14 = | .265*F1    | + | .752*D11 |      | + | .550    | D14 |          | .698 |
| N        | =F21 = | -.208*F211 | + | .978     | D21  |   |         |     |          | .043 |
| C        | =F22 = | .927*F211  | + | .374     | D22  |   |         |     |          | .860 |
| O        | =F23 = | .663*F212  | + | .749     | D23  |   |         |     |          | .439 |
| A        | =F24 = | .625 F211  | + | .781     | D24  |   |         |     |          | .390 |
| E        | =F25 = | .431 F212  | + | .903     | D25  |   |         |     |          | .185 |
| T_EI_SK  | =F31 = | .730*F311  | + | .684     | D31  |   |         |     |          | .533 |
| T_EI_STA | =F32 = | -.359*F311 | + | .933     | D32  |   |         |     |          | .129 |
| T_EI_SEN | =F33 = | .719 F311  | + | .695     | D33  |   |         |     |          | .517 |
| A_EI_REC | =F34 = | .677*F312  | + | .736     | D34  |   |         |     |          | .459 |
| A_EI_DEF | =F35 = | .797 F312  | + | .604     | D35  |   |         |     |          | .635 |
| A_STA    | =F211= | .881*F2    | + | .473     | D211 |   |         |     |          | .776 |
| B_PLA    | =F212= | .989 F2    | + | .147     | D212 |   |         |     |          | .978 |
| EIt      | =F311= | .828*F3    | + | .560     | D311 |   |         |     |          | .686 |
| EIA      | =F312= | .995 F3    | + | .095     | D312 |   |         |     |          | .991 |

CORRELATIONS AMONG INDEPENDENT VARIABLES  
-----

|              | E<br>--- | D<br>--- |   |
|--------------|----------|----------|---|
| E341- QUAL   | .329*I   |          | I |
| E282-SEA_MT5 | I        |          | I |
|              | I        |          | I |

GOODNESS OF FIT SUMMARY FOR METHOD = ML

MODEL AIC = -504.511      MODEL CAIC = -5026.663

CHI-SQUARE = 1701.489 BASED ON 1103 DEGREES OF FREEDOM  
PROBABILITY VALUE FOR THE CHI-SQUARE STATISTIC IS .00000

COMPARATIVE FIT INDEX (CFI) = .994  
ROOT MEAN-SQUARE ERROR OF APPROXIMATION (RMSEA) = .058  
90% CONFIDENCE INTERVAL OF RMSEA ( .052, .063)

RELIABILITY COEFFICIENTS  
-----

CRONBACH'S ALPHA = .802
